# Supplementary material for: Multi-instrument comparison and compilation of non-methane organic gas emissions from biomass burning and implications for smoke-derived secondary organic aerosol precursors
Source: Copernicus journal article supplement (doi:10.5194/acp-2016-598), 2016-07-18
Supplement: Supplementary file 1 [file Table S1.xlsx]

## Sheet: Ponderosa Pine
Compound Name	Formula	Mass (g/mol)	Instrument	EF (g/kg)
Methane	CH4	16	FTIR	4.2707
Carbon monoxide	CO	28	FTIR	82.9685
Carbon dioxide	CO2	44	FTIR	1654.13
Acetylene	C2H2	26	FTIR	0.959522
Hydrogen Cyanide	HCN	27	FTIR	0.496172
Ethene	C2H4	28	FTIR	3.49871
Formaldehyde	HCHO	30	FTIR	1.89171
Ethane	C2H6	30.069	WAS	0.687422
Methanol	CH3OH	32	FTIR	1.94861
Propyne	C3H4	40	PTR	1.01162
1,2-Propadiene	C3H4	40.06	WAS	0.0486571
Acetonitirile	C2H3N	41	PTR	0.134092
Ketene Fragments	C2H2O	42	PTR	1.27809
Propene	C3H6	42	FTIR	1.05339
Acetaldehyde	C2H4O	44	PTR	1.63185
Propane	C3H8	44.096	WAS	0.213179
Formic acid	HCOOH	46	FTIR	0.298998
1,3-Butadiyne	C4H2	50	PTR	0.00696058
Methyl chloride	CH3Cl	50.488	WAS	0.0666555
Butenyne	C4H4	52	PTR	0.0934258
Acrylonitrile	C3H3N	53.0265	GCxGC	0.030675
2-Propynal	C3H2O	54	PTR	0.0501016
1,3-Butadiene	C4H6	54.091	WAS	0.377836
Propanenitrile	C3H5N	55.0422	GCxGC	0.0178989
Acrolein	C3H4O	56	PTR	0.645112
1-Butene	C4H8	56.107	WAS	0.259662
i-Butene	C4H8	56.107	WAS	0.121212
trans-2-Butene	C4H8	56.107	WAS	0.0641075
cis-2-Butene	C4H8	56.107	WAS	0.0455217
Acetone	C3H6O	58	PTR	0.613514
Propanal	C3H6O	58.0419	GCxGC	0.0102813
2-Propen-1-ol	C3H6O	58.0419	GCxGC	0.0231578
i-Butane	C4H10	58.123	WAS	0.0284619
n-Butane	C4H10	58.123	WAS	0.088455
Glycolaldehyde	C2H4O2	60	FTIR	0.141964
Acetic Acid	CH3COOH	60	FTIR	2.64542
Carbonyl sulfide	OCS	60.07	WAS	0.0129773
Dimethyl Sulfide	C2H6S	62.129	WAS	0.0082919
Unknown	C5H4	64	PTR	0.00962573
Ethyl chloride	C2H5Cl	64.514	WAS	0.000380932
1-Buten-3-yne, 2-methyl-	C5H6	66.047	GCxGC	0.00240099
4-penten-1-yne	C5H6	66.047	GCxGC	0.00367166
1,3-Cyclopentadiene	C5H6	66.047	GCxGC	0.1799
3-Penten-1-yne, (E)-	C5H6	66.047	GCxGC	0.00344883
3-Penten-1-yne, (Z)-	C5H6	66.047	GCxGC	0.0065497
Methacrylonitrile	C4H5N	67.0422	GCxGC	0.0112383
3-Butenenitrile	C4H5N	67.0422	GCxGC	0.0079511
2-Butenenitrile	C4H5N	67.0422	GCxGC	0.00563685
Pyrrole	C4H5N	67.0422	GCxGC	0.110395
Carbon suboxide	C3O2	68	PTR	0.00914741
Furan	C4H4O	68	FTIR	0.252939
1,4-Pentadiene	C5H8	68.0626	GCxGC	0.0602954
Isoprene	C5H8	68.0626	GCxGC	0.404247
1,3-Pentadiene (E)	C5H8	68.0626	GCxGC	0.0728616
1,3-Pentadiene, (Z)-	C5H8	68.0626	GCxGC	0.0493247
Cyclopentene	C5H8	68.0626	GCxGC	0.0556137
2-Pentyne	C5H8	68.0626	GCxGC	0.00208365
Isobutyronitrile	C4H7N	69.0578	GCxGC	0.00928237
Butanenitrile	C4H7N	69.0578	GCxGC	0.00522136
Methacrolein	C4H6O	70.0419	GCxGC	0.101974
Furan, 2,5-dihydro-	C4H6O	70.0419	GCxGC	0.0030805
2,3-Dihydrofuran	C4H6O	70.0419	GCxGC	0.0208251
Methyl vinyl ketone	C4H6O	70.0419	GCxGC	0.285232
2-Butenal	C4H6O	70.0419	GCxGC	0.145822
1-Pentene	C5H10	70.0783	WAS	0.0696416
t-2-Pentene	C5H10	70.0783	WAS	0.0383534
c-2-Pentene	C5H10	70.0783	WAS	0.0228774
3-Methyl-1-Butene	C5H10	70.0783	WAS	0.0316247
2-Methyl-1-Butene	C5H10	70.0783	WAS	0.0430634
2-Methyl-2-Butene	C5H10	70.0783	WAS	0.090164
Cyclopentane	C5H10	70.0783	WAS	0.0010093
Methylglyoxal	C3H4O2	72	PTR	0.184136
Propanal, 2-methyl-	C4H8O	72.0575	GCxGC	0.0427045
Butanal	C4H8O	72.0575	GCxGC	0.0306391
2-Butanone	C4H8O	72.0575	GCxGC	0.123242
Furan, tetrahydro-	C4H8O	72.0575	GCxGC	0.00323042
Pentane	C5H12	72.0939	GCxGC	0.0644119
Hydroxyacetone	C3H6O2	74	PTR	0.419369
Acetic acid, methyl ester	C3H6O2	74.0368	GCxGC	0.0472828
Acetaldehyde, methoxy-	C3H6O2	74.0368	GCxGC	0.00249695
Hydroxyacetone	C3H6O2	74.0368	GCxGC	0.0521454
1-Butanol	C4H10O	74.0732	GCxGC	0.0299547
Unknown	C3H8S	76	PTR	0.0126881
Methyl nitrate	CH3NO3	77.04	WAS	0.000565878
1,5-Hexadiyne	C6H6	78.047	GCxGC	0.000858524
Benzene	C6H6	78.047	GCxGC	0.705489
Pyridine	C5H5N	79.0422	GCxGC	0.0302706
1-Hexen-3-yne	C6H8	80.0626	GCxGC	0.00632202
1,3-Cyclopentadiene, 1-methyl-	C6H8	80.0626	GCxGC	0.0905512
1,3-Cyclopentadiene, 5-methyl-	C6H8	80.0626	GCxGC	0.0780612
1,3-Cyclohexadiene	C6H8	80.0626	GCxGC	0.0688694
1,4-Cyclohexadiene	C6H8	80.0626	GCxGC	0.00164231
1H-Pyrrole, 1-methyl-	C5H7N	81.0578	GCxGC	0.0211092
1H-Pyrrole, 2-methyl-	C5H7N	81.0578	GCxGC	0.0154567
1H-Pyrrole, 3-methyl-	C5H7N	81.0578	GCxGC	0.0053605
Furan, 2-methyl-	C5H6O	82.0419	GCxGC	0.207442
Furan, 3-methyl-	C5H6O	82.0419	GCxGC	0.0220795
Pent-2-ynal	C5H6O	82.0419	GCxGC	0.00178166
1,4-Pentadien-3-one	C5H6O	82.0419	GCxGC	0.000754176
3-Cyclopenten-1-one	C5H6O	82.0419	GCxGC	0.0145918
2-Cyclopenten-1-one	C5H6O	82.0419	GCxGC	0.0633733
1,4-Pentadiene, 3-methyl-	C6H10	82.0783	GCxGC	0.00260662
1,4-Pentadiene, 2-methyl-	C6H10	82.0783	GCxGC	0.00788009
trans-1,4-Hexadiene	C6H10	82.0783	GCxGC	0.00793402
1,4-Hexadiene, (Z)-	C6H10	82.0783	GCxGC	0.00394992
1,3-Pentadiene, 2-methyl-, (Z)-	C6H10	82.0783	GCxGC	0.0545821
Cyclopentene, 3-methyl-	C6H10	82.0783	GCxGC	0.00656468
1,3-Butadiene, 2,3-dimethyl-	C6H10	82.0783	GCxGC	0.00503815
1,3-Hexadiene,c&t	C6H10	82.0783	GCxGC	0.0192795
1,3-Pentadiene, 2-methyl-, (E)-	C6H10	82.0783	GCxGC	0.0194491
4-Methyl-1,3-pentadiene	C6H10	82.0783	GCxGC	0.019874
Cyclopentene, 1-methyl-	C6H10	82.0783	GCxGC	0.0420803
1,3-Pentadiene, 3-methyl-, (Z)-	C6H10	82.0783	GCxGC	0.0191525
2,4-Hexadiene, (E,E)-	C6H10	82.0783	GCxGC	0.00704917
2,4-Hexadiene, (E,Z)-	C6H10	82.0783	GCxGC	0.0107513
Cyclohexene	C6H10	82.0783	GCxGC	0.0414714
Cyclopentane, methylene-	C6H10	82.0783	GCxGC	0.0019336
Butanenitrile, 2-methyl-	C5H9N	83.0735	GCxGC	0.00599804
Butanenitrile, 3-methyl-	C5H9N	83.0735	GCxGC	0.0109249
2-Furanone	C4H4O2	84	PTR	0.840887
Thiophene	C4H4S	84.0034	GCxGC	0.00464238
Furan, 2,3-dihydro-5-methyl-	C5H8O	84.0575	GCxGC	0.00620983
2-Ethylacrolein	C5H8O	84.0575	GCxGC	0.00441631
3-Buten-2-one, 3-methyl-	C5H8O	84.0575	GCxGC	0.0700635
4-pentenal	C5H8O	84.0575	GCxGC	0.00342657
2H-Pyran, 3,4-dihydro-	C5H8O	84.0575	GCxGC	0.00301104
3-Penten-2-one	C5H8O	84.0575	GCxGC	0.00425773
1-Penten-3-one	C5H8O	84.0575	GCxGC	0.00337679
3-Penten-2-one, (E)-	C5H8O	84.0575	GCxGC	0.010065
2-Butenal, 2-methyl-, (E)-	C5H8O	84.0575	GCxGC	0.0084552
2-Pentenal, (E)-	C5H8O	84.0575	GCxGC	0.00286148
2-Butenal, 3-methyl-	C5H8O	84.0575	GCxGC	0.00364884
Cyclopentanone	C5H8O	84.0575	GCxGC	0.0337028
1-Pentene, 4-methyl-	C6H12	84.0939	GCxGC	0.00745693
1-Butene, 2,3-dimethyl-	C6H12	84.0939	GCxGC	0.0227832
1-Hexene	C6H12	84.0939	GCxGC	0.164283
2-Hexene, (E)-	C6H12	84.0939	GCxGC	0.0122615
2-Pentene, 2-methyl-	C6H12	84.0939	GCxGC	0.032522
2-Pentene, 3-methyl-, (Z)-	C6H12	84.0939	GCxGC	0.012189
2-Pentene, 3-methyl-, (E)-	C6H12	84.0939	GCxGC	0.0126338
Cyclopentane, methyl-	C6H12	84.0939	GCxGC	0.00784561
2-pentene, 4-methyl	C6H12	84.0939	GCxGC	0.00122879
Acetic acid ethenyl ester	C4H6O2	86.0368	GCxGC	0.00338759
2,3-Butanedione	C4H6O2	86.0368	GCxGC	0.178973
2-Propenoic acid, methyl ester	C4H6O2	86.0368	GCxGC	0.00942661
Butyrolactone	C4H6O2	86.0368	GCxGC	0.00734046
Butanal, 2-methyl-	C5H10O	86.0732	GCxGC	0.0222438
2-Pentanone	C5H10O	86.0732	GCxGC	0.0194626
Pentanal	C5H10O	86.0732	GCxGC	0.0198999
Pentane, 2-methyl-	C6H14	86.1096	GCxGC	0.00752268
Hexane	C6H14	86.1096	GCxGC	0.0477726
Unknown	C3H4O3	88	PTR	0.0079608
Ethyl acetate	C4H8O2	88	PTR	0.048521
Methyl propionate	C4H8O2	88.0524	GCxGC	0.00581396
Unknown	C7H6	90	PTR	0.0328218
Ethyl nitrate	C2H5NO3	91.07	WAS	0.00179693
Unknown	C6H4O	92	PTR	0.0488711
C7H8 isomer	C7H8	92.0626	GCxGC	0.00262919
C7H8 isomer	C7H8	92.0626	GCxGC	0.00197252
Toluene	C7H8	92.0626	GCxGC	0.476642
C7H8 isomer	C7H8	92.0626	GCxGC	0.00109263
Pyridine, 2-methyl-	C6H7N	93.0578	GCxGC	0.00581631
Vinylfuran	C6H6O	94.0419	GCxGC	0.00953488
Phenol	C6H6O	94.0419	GCxGC	0.482689
C7H10 isomer	C7H10	94.0783	GCxGC	0.00265756
C7H10 isomer	C7H10	94.0783	GCxGC	0.00117365
C7H10 isomer	C7H10	94.0783	GCxGC	0.00218981
C7H10 isomer	C7H10	94.0783	GCxGC	0.00541922
C7H10 isomer	C7H10	94.0783	GCxGC	0.00296686
C7H10 isomer	C7H10	94.0783	GCxGC	0.0126293
C7H10 isomer	C7H10	94.0783	GCxGC	0.0224498
C7H10 isomer	C7H10	94.0783	GCxGC	0.0176471
C7H10 isomer	C7H10	94.0783	GCxGC	0.00587215
C7H10 isomer	C7H10	94.0783	GCxGC	0.0147189
C7H10 isomer	C7H10	94.0783	GCxGC	0.00523966
1H-Pyrrole, 1-ethyl-	C6H9N	95.0735	GCxGC	0.00623236
1H-Pyrrole, 2,5-dimethyl-	C6H9N	95.0735	GCxGC	0.00593666
3-Furaldehyde	C5H4O2	96.0211	GCxGC	0.0289462
Furfural	C5H4O2	96.0211	GCxGC	0.437734
2-Cyclopentene-1,4-dione	C5H4O2	96.0211	GCxGC	0.0118134
Furan, 2-ethyl-	C6H8O	96.0575	GCxGC	0.0121114
Furan, 2,5-dimethyl-	C6H8O	96.0575	GCxGC	0.07916
Furan, 3-ethyl-	C6H8O	96.0575	GCxGC	0.00210672
Furan, 2,4-dimethyl-	C6H8O	96.0575	GCxGC	0.0130599
2-Cyclopenten-1-one, 2-methyl-	C6H8O	96.0575	GCxGC	0.0186934
C7H12 isomer	C7H12	96.0939	GCxGC	0.00208376
C7H12 isomer	C7H12	96.0939	GCxGC	0.00241109
1,6-Heptadiene	C7H12	96.0939	GCxGC	0.0143004
C7H12 isomer	C7H12	96.0939	GCxGC	0.00405025
C7H12 isomer	C7H12	96.0939	GCxGC	0.00498259
3,5-Dimethylcyclopentene	C7H12	96.0939	GCxGC	0.00613102
C7H12 isomer	C7H12	96.0939	GCxGC	0.00970788
C7H12 isomer	C7H12	96.0939	GCxGC	0.00928128
C7H12 isomer	C7H12	96.0939	GCxGC	0.00722036
Cyclopentene, 3-ethyl-	C7H12	96.0939	GCxGC	0.00462902
Vinylcyclopentane	C7H12	96.0939	GCxGC	0.00762526
C7H12 isomer	C7H12	96.0939	GCxGC	0.00450218
C7H12 isomer	C7H12	96.0939	GCxGC	0.00343628
Cyclohexene, 3-methyl-	C7H12	96.0939	GCxGC	0.0134544
Cyclohexene, 4-methyl-	C7H12	96.0939	GCxGC	0.00540472
C7H12 isomer	C7H12	96.0939	GCxGC	0.00274812
C7H12 isomer	C7H12	96.0939	GCxGC	0.00217075
Cyclopentene, 4,4-dimethyl-	C7H12	96.0939	GCxGC	0.0176844
C7H12 isomer	C7H12	96.0939	GCxGC	0.00630484
C7H12 isomer	C7H12	96.0939	GCxGC	0.00527819
Cyclohexene, 1-methyl-	C7H12	96.0939	GCxGC	0.0108434
C7H12 isomer	C7H12	96.0939	GCxGC	0.00259205
C7H12 isomer	C7H12	96.0939	GCxGC	0.00326897
C7H12 isomer	C7H12	96.0939	GCxGC	0.00345288
C7H12 isomer	C7H12	96.0939	GCxGC	0.00298117
Pentanenitrile, 4-methyl-	C6H11N	97.0891	GCxGC	0.00572956
Unknown	C4H2O3	98	PTR	0.0196883
Thiophene, 2-methyl-	C5H6S	98.019	GCxGC	0.00192977
2-Furan Methanol	C5H6O2	98.0368	GCxGC	0.131656
2(3H)-Furanone, 5-methyl-	C5H6O3	98.0368	GCxGC	0.00306396
Unknown	C6H10O	98	PTR	0.0727831
5-Hexen-2-one	C6H10O	98.0732	GCxGC	0.00177229
4-Penten-2-one, 3-methyl-	C6H10O	98.0732	GCxGC	0.00146623
Cyclopentanone, 2-methyl-	C6H10O	98.0732	GCxGC	0.00811742
2-Pentanone, 3-methylene-	C6H10O	98.0732	GCxGC	0.00115763
Cyclohexanone	C6H10O	98.0732	GCxGC	0.00685414
1-Hexene, 3-methyl-	C7H14	98.1096	GCxGC	0.00159243
1-Hexene, 5-methyl-	C7H14	98.1096	GCxGC	0.00224689
1-Butene, 2-ethyl, 3-methyl	C7H14	98.1096	GCxGC	0.00564825
1-Heptene	C7H14	98.1096	GCxGC	0.0687685
3-Heptene, (E)-	C7H14	98.1096	GCxGC	0.00193741
(Z)-3-Methyl-2-hexene	C7H14	98.1096	GCxGC	0.00255482
2-Heptene, (E)-	C7H14	98.1096	GCxGC	0.0155004
(2E)-3-Methyl-2-hexene	C7H14	98.1096	GCxGC	0.00158759
2-Heptene, Z	C7H14	98.1096	GCxGC	0.00484592
Cyclohexane, methyl-	C7H14	98.1096	GCxGC	0.00328182
Cyclopentane, ethyl-	C7H14	98.1096	GCxGC	0.00490862
Unknown	C4H4O3	100	PTR	0.0294552
Unknown	C5H8O2	100	PTR	0.0992673
2,3-Pentanedione	C5H8O2	100.052	GCxGC	0.025685
Acetic acid, 2-propenyl ester	C5H8O2	100.052	GCxGC	0.00377046
2-Propenoic acid, 2-methyl-, methyl ester	C5H8O2	100.052	GCxGC	0.00623917
Methyl Isobutyl Ketone	C6H12O	100.089	GCxGC	0.00430506
2-Hexanone	C6H12O	100.089	GCxGC	0.00567695
Hexanal	C6H12O	100.089	GCxGC	0.01089
Pentane, 2,4-dimethyl-	C7H16	100.125	GCxGC	0.000444616
Hexane, 2-methyl-	C7H16	100.125	GCxGC	0.000708492
Pentane, 2,3-dimethyl-	C7H16	100.125	GCxGC	0.00168381
Heptane	C7H16	100.125	GCxGC	0.0322915
Unknown	C5H10O2	102	PTR	0.0291617
Unknown	C4H6O3	102	PTR	0.0455288
Acetic anhydride	C4H6O3	102.032	GCxGC	0.0176832
Phenylacetylene	C8H6	102.047	GCxGC	0.0317484
Butanoic acid, methyl ester	C5H10O2	102.068	GCxGC	0.00278204
Benzonitrile	C7H5N	103.042	GCxGC	0.0255447
Styrene	C8H8	104.063	GCxGC	0.135173
C8H8 isomer	C8H8	104.063	GCxGC	0.00162976
n-Propyl nitrate	C3H7NO3	105.09	WAS	0.000191717
Benzaldehyde	C7H6O	106	PTR	0.16098
Benzaldehyde	C7H6O	106.042	GCxGC	0.0713984
Ethylbenzene	C8H10	106.078	GCxGC	0.0804266
C8H10 isomer	C8H10	106.078	GCxGC	0.00170661
m&p-Xylene	C8H10	106.078	GCxGC	0.151602
C8H10 isomer	C8H10	106.078	GCxGC	0.00191574
o-Xylene	C8H10	106.078	GCxGC	0.0546279
C8H10 isomer	C8H10	106.078	GCxGC	0.0017535
Phenol, 2-methyl	C7H8O	108.058	GCxGC	0.0497326
C8H12 isomer	C8H12	108.094	GCxGC	0.00579425
C8H12 isomer	C8H12	108.094	GCxGC	0.00130768
C8H12 isomer	C8H12	108.094	GCxGC	0.00144693
C8H12 isomer	C8H12	108.094	GCxGC	0.00217283
C8H12 isomer	C8H12	108.094	GCxGC	0.00229034
C8H12 isomer	C8H12	108.094	GCxGC	0.00129161
C8H12 isomer	C8H12	108.094	GCxGC	0.00152082
C8H12 isomer	C8H12	108.094	GCxGC	0.00179866
C8H12 isomer	C8H12	108.094	GCxGC	0.00614714
C8H12 isomer	C8H12	108.094	GCxGC	0.00128174
C8H12 isomer	C8H12	108.094	GCxGC	0.00285001
C8H12 isomer	C8H12	108.094	GCxGC	0.00287692
C8H12 isomer	C8H12	108.094	GCxGC	0.0100908
C8H12 isomer	C8H12	108.094	GCxGC	0.00418212
C8H12 isomer	C8H12	108.094	GCxGC	0.00312496
C8H12 isomer	C8H12	108.094	GCxGC	0.00241441
C8H12 isomer	C8H12	108.094	GCxGC	0.00254023
Catechol (Benzenediols); Methylfurfural	C6H6O2	110	PTR	0.66174
Furan, 2-acetyl-	C6H6O2	110.037	GCxGC	0.0176561
5-Methyl furfural	C6H6O2	110.037	GCxGC	0.0336253
Unknown	C7H10O	110	PTR	0.123713
Furan, 2-propyl-	C7H10O	110.073	GCxGC	0.00196866
Furan, 2-ethyl-5-methyl-	C7H10O	110.073	GCxGC	0.0102745
Furan, 2,3,5-trimethyl-	C7H10O	110.073	GCxGC	0.00251245
2-Cyclopenten-1-one, 3,4-dimethyl-	C7H10O	110.073	GCxGC	0.00405972
1,7-Octadiene	C8H14	110.11	GCxGC	0.0116049
C8H14 isomer	C8H14	110.11	GCxGC	0.00359117
C8H14 isomer	C8H14	110.11	GCxGC	0.00202698
C8H14 isomer	C8H14	110.11	GCxGC	0.00376396
1-Ethyl-5-methylcyclopentene	C8H14	110.11	GCxGC	0.00227125
C8H14 isomer	C8H14	110.11	GCxGC	0.00175102
Cyclopentene, 3-propyl-	C8H14	110.11	GCxGC	0.00171166
C8H14 isomer	C8H14	110.11	GCxGC	0.0230849
C8H14 isomer	C8H14	110.11	GCxGC	0.00734381
C8H14 isomer	C8H14	110.11	GCxGC	0.0021786
C8H14 isomer	C8H14	110.11	GCxGC	0.00248627
C8H14 isomer	C8H14	110.11	GCxGC	0.00250025
C8H14 isomer	C8H14	110.11	GCxGC	0.00204296
C8H14 isomer	C8H14	110.11	GCxGC	0.00183527
Cyclohexane, ethylidene-	C8H14	110.11	GCxGC	0.00269795
C8H14 isomer	C8H14	110.11	GCxGC	0.00349743
Unknown	C5H4O3	112	PTR	0.0538152
2-Hydroxy-3-Methyl-2-Cyclopentenone	C6H8O2	112	PTR	0.16559
1-Hexene, 2,5-dimethyl-	C8H16	112.125	GCxGC	0.00162741
Cyclohexane, 1,4-dimethyl	C8H16	112.125	GCxGC	0.002478
1-Heptene, 2-methyl-	C8H16	112.125	GCxGC	0.00182618
1-Octene	C8H16	112.125	GCxGC	0.0535587
3-Octene, (E)-	C8H16	112.125	GCxGC	0.00197079
2-Methyl-2-heptene	C8H16	112.125	GCxGC	0.00181449
2-Octene, (E)-	C8H16	112.125	GCxGC	0.00647447
2-Octene, (Z)-	C8H16	112.125	GCxGC	0.00315876
Cyclopentane, propyl-	C8H16	112.125	GCxGC	0.00215718
Cyclohexane, ethyl-	C8H16	112.125	GCxGC	0.00143171
Unknown	C5H6O3	114	PTR	0.0864047
Unknown	C6H10O2	114	PTR	0.0455815
2,3-pentanedione, 4-methyl	C6H10O2	114.068	GCxGC	0.00231516
2-Heptanone	C7H14O	114.105	GCxGC	0.00239877
Heptanal	C7H14O	114.105	GCxGC	0.0086612
Octane	C8H18	114.141	GCxGC	0.0273112
Unknown	C5H8O3	116	PTR	0.0632656
Benzene,1-ethynyl-2-methyl-	C9H8	116.063	GCxGC	0.00501115
Indene	C9H8	116.063	GCxGC	0.0678433
Acetic acid, butyl ester	C6H12O2	116.084	GCxGC	0.00339171
Benzofuran	C8H6O	118	PTR	0.0466648
2-propenyl benzene	C9H10	118.078	GCxGC	0.00639337
à-Methylstyrene	C9H10	118.078	GCxGC	0.0162281
Benzene, 1-propenyl, cis	C9H10	118.078	GCxGC	0.00497608
Benzene, 1-ethenyl-3-methyl-	C9H10	118.078	GCxGC	0.062821
4-methyl styrene	C9H10	118.078	GCxGC	0.0110511
Benzene, 1-propenyl, trans	C9H10	118.078	GCxGC	0.0107485
Indane	C9H10	118.078	GCxGC	0.0110495
2-Butyl nitrate	C4H9NO3	119.12	WAS	0.000377436
Vinylphenol	C8H8O	120	PTR	0.129262
Benzeneacetaldehyde	C8H8O	120.058	GCxGC	0.00317305
Acetophenone	C8H8O	120.058	GCxGC	0.00669391
Benzaldehyde, 3-methyl-	C8H8O	120.058	GCxGC	0.0253274
Benzene, isopropyl	C9H12	120.094	GCxGC	0.00838542
Benzene, propyl-	C9H12	120.094	GCxGC	0.0118272
Benzene, 1-ethyl-3-methyl-	C9H12	120.094	GCxGC	0.0290055
Benzene, 1-ethyl-4-methyl-	C9H12	120.094	GCxGC	0.0106401
Benzene, 1,3,5-trimethyl-	C9H12	120.094	GCxGC	0.00783447
Benzene, 1-ethyl-2-methyl-	C9H12	120.094	GCxGC	0.0151542
Benzene, 1,2,4-trimethyl-	C9H12	120.094	GCxGC	0.0183753
Benzene, 1,2,3-trimethyl-	C9H12	120.094	GCxGC	0.0243419
Salicylaldehyde	C7H6O2	122	PTR	0.086874
Salicyladehyde	C7H6O2	122.037	GCxGC	0.0153902
Xylenols	C8H10O	122	PTR	0.062005
Benzene, 1-methoxy-4-methyl-	C8H10O	122.073	GCxGC	0.0108705
2,5-dimethyl phenol	C8H10O	122.073	GCxGC	0.0110119
Unknown	C9H14	122	PTR	0.039738
C9H14 isomer	C9H14	122.11	GCxGC	0.00154625
C9H14 isomer	C9H14	122.11	GCxGC	0.000665925
C9H14 isomer	C9H14	122.11	GCxGC	0.000805614
C9H14 isomer	C9H14	122.11	GCxGC	0.00315538
C9H14 isomer	C9H14	122.11	GCxGC	0.00195121
C9H14 isomer	C9H14	122.11	GCxGC	0.00126261
C9H14 isomer	C9H14	122.11	GCxGC	0.00234912
C9H14 isomer	C9H14	122.11	GCxGC	0.000666715
C9H14 isomer	C9H14	122.11	GCxGC	0.00229355
o-Guaiacol	C7H8O2	124.052	GCxGC	0.0549216
C9H16 isomer	C9H16	124.125	GCxGC	0.00252036
C9H16 isomer	C9H16	124.125	GCxGC	0.00127693
C9H16 isomer	C9H16	124.125	GCxGC	0.00518506
1,8-Nonadiene	C9H16	124.125	GCxGC	0.0134769
C9H16 isomer	C9H16	124.125	GCxGC	0.00168199
C9H16 isomer	C9H16	124.125	GCxGC	0.00253207
C9H16 isomer	C9H16	124.125	GCxGC	0.00261523
C9H16 isomer	C9H16	124.125	GCxGC	0.00185517
C9H16 isomer	C9H16	124.125	GCxGC	0.00326294
C9H16 isomer	C9H16	124.125	GCxGC	0.001962
C9H16 isomer	C9H16	124.125	GCxGC	0.00233695
C9H16 isomer	C9H16	124.125	GCxGC	0.00599942
C9H16 isomer	C9H16	124.125	GCxGC	0.00625755
C9H16 isomer	C9H16	124.125	GCxGC	0.00250356
Hydroxymethylfurfural	C6H6O3	126	PTR	0.214775
Unknown	C7H10O2	126	PTR	0.0738478
1-Heptene, 2,6-dimethyl-	C9H18	126.141	GCxGC	0.00288816
4-Nonene, E	C9H18	126.141	GCxGC	0.00191518
1-Nonene	C9H18	126.141	GCxGC	0.0354192
4-Nonene, Z	C9H18	126.141	GCxGC	0.00245443
2-Nonene, (E)-	C9H18	126.141	GCxGC	0.00323006
cis-2-Nonene	C9H18	126.141	GCxGC	0.00228806
Cyclopentane, butyl-	C9H18	126.141	GCxGC	0.00275883
1-Octene, 4-methyl-	C9H18	126.141	GCxGC	0.00135562
4-Phenylbut-3-ene-1-yne	C10H8	128.063	GCxGC	0.0053196
Naphthalene	C10H8	128.063	GCxGC	0.0891053
Heptane, 2,6-dimethyl-	C9H20	128.156	GCxGC	0.00158875
Nonane	C9H20	128.156	GCxGC	0.0193075
C10H10 isomer	C10H10	130.078	GCxGC	0.00281997
C10H10 isomer	C10H10	130.078	GCxGC	0.00341057
C10H10 isomer	C10H10	130.078	GCxGC	0.0196609
C10H10 isomer	C10H10	130.078	GCxGC	0.0160362
C10H10 isomer	C10H10	130.078	GCxGC	0.00503227
Unknown	C9H8O	132	PTR	0.0682385
Methyl benzofuran isomer	C9H8O	132.058	GCxGC	0.00604227
Methyl benzofuran isomer	C9H8O	132.058	GCxGC	0.0119674
Methyl benzofuran isomer	C9H8O	132.058	GCxGC	0.0131226
o-Isopropenyltoluene	C10H12	132.094	GCxGC	0.00385248
C10H12 isomer	C10H12	132.094	GCxGC	0.00420102
C10H12 isomer	C10H12	132.094	GCxGC	0.00397617
C10H12 isomer	C10H12	132.094	GCxGC	0.012438
C10H12 isomer	C10H12	132.094	GCxGC	0.00789789
C10H12 isomer	C10H12	132.094	GCxGC	0.0242967
C10H12 isomer	C10H12	132.094	GCxGC	0.00333145
C10H12 isomer	C10H12	132.094	GCxGC	0.00335516
C10H12 isomer	C10H12	132.094	GCxGC	0.00457724
C10H12 isomer	C10H12	132.094	GCxGC	0.00356845
C10H12 isomer	C10H12	132.094	GCxGC	0.00391008
C10H12 isomer	C10H12	132.094	GCxGC	0.00304436
3-Pentyl Nitrate	C5H11NO3	133.147	WAS	0.00100996
2-Pentyl Nitrate	C5H11NO3	133.147	WAS	0.0010547
3-Methyl-2-Butyl Nitrate	C5H11NO3	133.147	WAS	0.00100996
Unknown	C8H6O2	134	PTR	0.023278
Unknown	C9H10O	134	PTR	0.0446435
C10H14 isomer	C10H14	134.11	GCxGC	0.00442685
C10H14 isomer	C10H14	134.11	GCxGC	0.0065658
C10H14 isomer	C10H14	134.11	GCxGC	0.00729626
m-Cymene	C10H14	134.11	GCxGC	0.0122193
p-Cymene	C10H14	134.11	GCxGC	0.0387565
Benzene, 1,4-diethyl-	C10H14	134.11	GCxGC	0.00265095
Benzene, 1-methyl-3-propyl-	C10H14	134.11	GCxGC	0.00428518
Benzene, 1-methyl-4-propyl-	C10H14	134.11	GCxGC	0.00313422
Benzene, butyl-	C10H14	134.11	GCxGC	0.00916888
Benzene, 1-ethyl-3,5-dimethyl-	C10H14	134.11	GCxGC	0.00370122
Benzene, 1-methyl-2-propyl-	C10H14	134.11	GCxGC	0.00456936
Benzene, 2-ethyl-1,4-dimethyl-	C10H14	134.11	GCxGC	0.00310248
1,3-Dimethyl-4-ethylbenzene	C10H14	134.11	GCxGC	0.00482803
Benzene, 4-ethyl-1,2-dimethyl-	C10H14	134.11	GCxGC	0.00387386
Benzene, 2-ethyl-1,3-dimethyl-	C10H14	134.11	GCxGC	0.00237925
1,2-Dimethyl-3-ethylbenzene	C10H14	134.11	GCxGC	0.0028988
1,2,3,5-tetramethylbenzene	C10H14	134.11	GCxGC	0.00760916
Unknown	C8H8O2	136	PTR	0.10692
Benzoic acid, methyl ester	C8H8O2	136.052	GCxGC	0.0164971
Unknown	C9H12O	136	PTR	0.0526714
C10H16 isomer	C10H16	136.125	GCxGC	0.00115579
C10H16 isomer	C10H16	136.125	GCxGC	0.00218043
Gamma-Pyronene	C10H16	136.125	GCxGC	0.00881804
Alpha-Thujene	C10H16	136.125	GCxGC	0.00890582
Alpha-Pinene	C10H16	136.125	GCxGC	0.0824517
C10H16 isomer	C10H16	136.125	GCxGC	0.00311774
Alpha-Fenchene	C10H16	136.125	GCxGC	0.00877422
Camphene	C10H16	136.125	GCxGC	0.0170204
1,3-Cyclopentadiene, 5,5-dimethyl-2-propyl-	C10H16	136.125	GCxGC	0.0113732
Cyclohexene, 4-ethenyl-1,4-dimethyl-	C10H16	136.125	GCxGC	0.0166197
C10H16 isomer	C10H16	136.125	GCxGC	0.00536703
C10H16 isomer	C10H16	136.125	GCxGC	0.00154735
C10H16 isomer	C10H16	136.125	GCxGC	0.00163084
Sabinene	C10H16	136.125	GCxGC	0.00520058
Beta-Pinene	C10H16	136.125	GCxGC	0.230589
Beta-Myrcene	C10H16	136.125	GCxGC	0.215231
Pyronene?	C10H16	136.125	GCxGC	0.00266686
C10H16 isomer	C10H16	136.125	GCxGC	0.0048983
a-Phellandrene	C10H16	136.125	GCxGC	0.0164809
3-Carene	C10H16	136.125	GCxGC	0.176106
Alpha-Terpinene	C10H16	136.125	GCxGC	0.0108521
C10H16 isomer	C10H16	136.125	GCxGC	0.00337774
Limonene	C10H16	136.125	GCxGC	0.170949
Z-Ocimene	C10H16	136.125	GCxGC	0.0382851
Beta-Phellandrene	C10H16	136.125	GCxGC	0.0244632
C10H16 isomer	C10H16	136.125	GCxGC	0.00512663
(E)-Ocimene	C10H16	136.125	GCxGC	0.00544437
Gamma terpinene	C10H16	136.125	GCxGC	0.00770673
C10H16 isomer	C10H16	136.125	GCxGC	0.00608957
Terpinolene	C10H16	136.125	GCxGC	0.0351494
Allo-ocimene or a-pyronene	C10H16	136.125	GCxGC	0.00638206
Allo-ocimene or a-pyronene	C10H16	136.125	GCxGC	0.00240131
Unknown	C8H10O2	138	PTR	0.213789
C10H18 isomer	C10H18	138.141	GCxGC	0.00263732
C10H18 isomer	C10H18	138.141	GCxGC	0.00490929
C10H18 isomer	C10H18	138.141	GCxGC	0.00165979
1,9-Decadiene	C10H18	138.141	GCxGC	0.0121349
C10H18 isomer	C10H18	138.141	GCxGC	0.00565777
C10H18 isomer	C10H18	138.141	GCxGC	0.00647707
C10H18 isomer	C10H18	138.141	GCxGC	0.00249086
C10H18 isomer	C10H18	138.141	GCxGC	0.00793323
C10H18 isomer	C10H18	138.141	GCxGC	0.00270994
C10H18 isomer	C10H18	138.141	GCxGC	0.00268255
C10H18 isomer	C10H18	138.141	GCxGC	0.00226556
C10H18 isomer	C10H18	138.141	GCxGC	0.00343496
C10H18 isomer	C10H18	138.141	GCxGC	0.0164207
C10H18 isomer	C10H18	138.141	GCxGC	0.00206174
Unknown	C7H8O3	140	PTR	0.0295324
Unknown	C8H12O2	140	PTR	0.0207927
C10H20 isomer	C10H20	140.156	GCxGC	0.00159144
1-Decene	C10H20	140.156	GCxGC	0.0368617
C10H20 isomer	C10H20	140.156	GCxGC	0.00354593
C10H20 isomer	C10H20	140.156	GCxGC	0.0022203
C10H20 isomer	C10H20	140.156	GCxGC	0.00319166
Methyl iodide	CH3I	141.939	WAS	4.97439e-05
Naphthalene, 2-methyl-	C11H10	142.078	GCxGC	0.0162341
Naphthalene, 1-methyl-	C11H10	142.078	GCxGC	0.0159575
C10H22 isomer	C10H22	142.172	GCxGC	0.00170202
C10H22 isomer	C10H22	142.172	GCxGC	0.00357917
Nonane, 2-methyl-	C10H22	142.172	GCxGC	0.00105603
Decane	C10H22	142.172	GCxGC	0.0142748
C10H22 isomer	C10H22	142.172	GCxGC	0.00223404
Unknown	C10H8O	144	PTR	0.202575
C11H12 isomer	C11H12	144.094	GCxGC	0.0025048
C11H12 isomer	C11H12	144.094	GCxGC	0.00447628
C11H12 isomer	C11H12	144.094	GCxGC	0.00502516
Unknown	C10H10O	146	PTR	0.0376573
Benzofuran, -dimethyl- (isomer)	C10H10O	146.073	GCxGC	0.00397628
Benzofuran, -dimethyl- (isomer)	C10H10O	146.073	GCxGC	0.00620272
C11H14 isomer	C11H14	146.11	GCxGC	0.00410471
Unknown	C9H8O2	148	PTR	0.0216361
Estragole	C10H12O	148.089	GCxGC	0.0130283
C11H16 isomer	C11H16	148.125	GCxGC	0.00163348
C11H16 isomer	C11H16	148.125	GCxGC	0.00554892
C11H16 isomer	C11H16	148.125	GCxGC	0.00389747
C11H16 isomer	C11H16	148.125	GCxGC	0.00425234
Benzene, pentyl	C11H16	148.125	GCxGC	0.0111003
C11H16 isomer	C11H16	148.125	GCxGC	0.0063102
Unknown	C9H10O2	150	PTR	0.194924
C11H18 isomer	C11H18	150.141	GCxGC	0.00394466
Unknown	C12H8	152	PTR	0.0623798
Acenaphthylene	C12H8	152.063	GCxGC	0.0115267
1,10-Undecadiene	C11H20	152.156	GCxGC	0.00620499
C11H20 isomer	C11H20	152.156	GCxGC	0.00244553
C11H20 isomer	C11H20	152.156	GCxGC	0.00299038
C11H20 isomer	C11H20	152.156	GCxGC	0.00247039
Unknown	C8H10O3	154	PTR	0.0602932
Biphenyl	C12H10	154.078	GCxGC	0.00594924
C11H22 isomer	C11H22	154.172	GCxGC	0.00172857
1-Undecene	C11H22	154.172	GCxGC	0.0286297
C11H22 isomer	C11H22	154.172	GCxGC	0.00481038
C11H22 isomer	C11H22	154.172	GCxGC	0.00220067
C11H22 isomer	C11H22	154.172	GCxGC	0.00185259
Naphthalene, 1,3-dimethyl-	C12H12	156.094	GCxGC	0.00650331
Undecane	C11H24	156.188	GCxGC	0.0246082
Unknown	C11H10O	158	PTR	0.0156153
Unknown	C10H10O2	162	PTR	0.106849
Benzene, hexyl-	C12H18	162.141	GCxGC	0.00360905
Benzene, (1,3-dimethylbutyl)-	C12H18	162.141	GCxGC	0.00291091
Unknown	C10H12O2	164	PTR	0.0831572
1,11-Dodecadiene	C12H22	166.172	GCxGC	0.0104308
1-Dodecene	C12H24	168.188	GCxGC	0.0136102
C12H24 isomer	C12H24	168.188	GCxGC	0.00331875
Dodecane	C12H26	170.203	GCxGC	0.00448586
Unknown	C11H10O2	174	PTR	0.0335487
Unknown	C7H14O5	178	PTR	0.0413624
1,12-Tridecadiene	C13H24	180	GCxGC	0.00347577
1-Tridecene	C13H26	182.203	GCxGC	0.00885797
C13H28 isomer	C13H28	184.219	GCxGC	0.00176802
Tridecane	C13H28	184.219	GCxGC	0.00385859
Unknown	C15H20	200	PTR	0.0311287
Copaene	C15H24	204.188	GCxGC	0.00488986
Germacrene D	C15H24	204.188	GCxGC	0.0118472
1,6-Cyclodecadiene, 1-methyl-5-methylene-8-(1-methylethyl)-	C15H24	204.188	GCxGC	0.0102132
C15H24 isomer	C15H24	204.188	GCxGC	0.00733449
Cadinadiene isomer	C15H24	204.188	GCxGC	0.00748307
Cadinadiene isomer	C15H24	204.188	GCxGC	0.0055151
Cadinadiene isomer	C15H24	204.188	GCxGC	0.00836463
Total EF				1777.86
Total NMOG EF				36.4913
Sum of Positively or Tentatively Identified Compounds				32.2672
Percent of Positively or Tentatively Identified Compounds				0.884242

## Sheet: Black Spruce
Compound Name	Formula	Mass (g/mol)	Instrument	EF (g/kg)
Methane	CH4	16.043	FTIR	3.35489
Carbon Monoxide	CO	28.01	FTIR	73.3132
Carbon Dioxide	CO2	44.01	FTIR	1703.72
Acetylene	C2H2	26.04	FTIR	0.900524
Hydrogen Cyanide	HCN	27.0253	FTIR	0.265877
Ethylene	C2H4	28.054	FTIR	3.16399
Formaldehyde	HCHO	30.031	FTIR	1.52717
Ethane	C2H6	30.069	WAS	0.383695
Methanol	CH3OH	32.04	FTIR	1.36986
Propyne	C3H4	40.0286	PTR	0.935205
1,2-propadiene	C3H4	40.06	WAS	0.0377808
Acetonitirile	C2H3N	41.0238	PTR	0.0797949
Ketene Fragments	C2H2O	42.0078	PTR	1.55681
Propylene	C3H6	42.08	FTIR	0.737604
Acetaldehyde	C2H4O	44.0235	PTR	1.96832
Propane	C3H8	44.096	WAS	0.275515
Formic Acid	HCOOH	46.0254	FTIR	0.258284
Unknown	C2H6O	46	PTR	0.740705
Methanethiol	CH4S	48.0006	PTR	0.0145426
1,3-Butadiyne	C4H2	50.0129	PTR	0.00975679
Methyl chloride	CH3Cl	50.488	WAS	0.0586176
Butenyne	C4H4	52.0286	PTR	0.11912
Acrylonitrile	C3H3N	53.0265	GCxGC	0.0157507
2-Propynal	C3H2O	54.0078	PTR	0.0429629
1,3-Butadiene	C4H6	54.0442	PTR	0.619573
1,3-butadiene	C4H6	54.091	WAS	0.0794187
Propanenitrile	C3H5N	55.0422	GCxGC	0.0106573
Acrolein	C3H4O	56.0235	PTR	0.81337
1-Butene	C4H8	56.107	WAS	0.183799
i-Butene	C4H8	56.107	WAS	0.0831805
trans-2-Butene	C4H8	56.107	WAS	0.0370804
cis-2-Butene	C4H8	56.107	WAS	0.0228496
Acetone	C3H6O	58.0391	PTR	0.370392
Propanal	C3H6O	58.0419	GCxGC	0.0135817
2-Propen-1-ol	C3H6O	58.0419	GCxGC	0.0114001
i-Butane	C4H10	58.123	WAS	0.0433961
n-Butane	C4H10	58.123	WAS	0.0836776
Acetic Acid	CH3COOH	60.05	FTIR	1.87381
Glycolaldehyde	C2H4O2	60.052	FTIR	0.17682
Carbonyl sulfide	OCS	60.07	WAS	0.0510729
Dimethyl Sulfide	C2H6S	62.0163	PTR	0.0229006
Dimethyl Sulfide	C2H6S	62.129	WAS	0.0012873
Unknown	CH5O3	64	PTR	0.00824162
Ethyl chloride	C2H5Cl	64.514	WAS	0.00046782
1,3-Cyclopentadiene	C5H6	66.0442	PTR	0.323044
1,3-Cyclopentadiene	C5H6	66.047	GCxGC	0.128359
1-Buten-3-yne, 2-methyl-	C5H6	66.047	GCxGC	0.00212224
4-Penten-1-yne	C5H6	66.047	GCxGC	0.000997117
3-Penten-1-yne, (E)-	C5H6	66.047	GCxGC	0.00145459
1-Penten-3-yne, (E)-	C5H6	66.047	GCxGC	0.00214179
3-Penten-1-yne, (Z)-	C5H6	66.047	GCxGC	0.00757778
Methacrylonitrile	C4H5N	67.0422	GCxGC	0.00859454
3-Butenenitrile	C4H5N	67.0422	GCxGC	0.00538757
Pyrrole	C4H5N	67.0422	GCxGC	0.0415146
Carbon suboxide	C3O2	67.9871	PTR	0.00544224
Furan	C4H4O	68.07	FTIR	0.153148
3-Butyn-2-one	C4H4O	68.0262	GCxGC	0.000712276
1-Butyne, 3-methyl-	C5H8	68.0626	GCxGC	0.000895759
1,4-Pentadiene	C5H8	68.0626	GCxGC	0.0208064
Isoprene	C5H8	68.0626	GCxGC	0.27888
1,3-Pentadiene, (E)-	C5H8	68.0626	GCxGC	0.0598097
1,3-Pentadiene, (Z)-	C5H8	68.0626	GCxGC	0.03434
Cyclopentene	C5H8	68.0626	GCxGC	0.0274254
2-Pentyne	C5H8	68.0626	GCxGC	0.00195504
Isobutyronitrile	C4H7N	69.0578	GCxGC	0.00569622
Butanenitrile	C4H7N	69.0578	GCxGC	0.0035205
Methacrolein	C4H6O	70.0419	GCxGC	0.0688093
Furan, 2,5-dihydro-	C4H6O	70.0419	GCxGC	0.00154814
2,3-Dihydrofuran	C4H6O	70.0419	GCxGC	0.00862096
Methyl vinyl ketone	C4H6O	70.0419	GCxGC	0.203275
2-Butenal	C4H6O	70.0419	GCxGC	0.0846998
1-Butene, 3-methyl-	C5H10	70.0783	GCxGC	0.0270601
1-Pentene	C5H10	70.0783	GCxGC	0.0261599
2-Methyl-1-butene	C5H10	70.0783	GCxGC	0.0414982
2-Pentene, (E)-	C5H10	70.0783	GCxGC	0.0225469
2-Pentene, (E)-	C5H10	70.0783	GCxGC	0.053471
Cyclopentane	C5H10	70.0783	GCxGC	0.00108871
Methylglyoxal	C3H4O2	72.0184	PTR	0.258137
Propanal, 2-methyl-	C4H8O	72.0575	GCxGC	0.0211526
Butanal	C4H8O	72.0575	GCxGC	0.0168622
2-Butanone	C4H8O	72.0575	GCxGC	0.0490371
Furan, tetrahydro-	C4H8O	72.0575	GCxGC	0.0013065
Pentane	C5H12	72.0939	GCxGC	0.0299615
Hydroxyacetone	C3H6O2	74.0341	PTR	0.388247
Formic acid, ethyl ester	C3H6O2	74.0368	GCxGC	0.00198724
Acetic acid, methyl ester	C3H6O2	74.0368	GCxGC	0.0206051
Carbon Disulfide	CS2	76.14	WAS	0.0192304
Methyl nitrate	CH3NO3	77.04	WAS	0.00156873
Benzene	C6H6	78.0442	PTR	0.747234
1,5-Hexadien-3-yne	C6H6	78.047	GCxGC	0.00749256
Pyridine	C5H5N	79.0422	GCxGC	0.0242185
2,4-Cyclopentadiene-1-one	C5H4O	80.0235	PTR	0.0607336
1-Hexen-3-yne	C6H8	80.0626	GCxGC	0.00234281
1,3-Cyclopentadiene, 1-methyl-	C6H8	80.0626	GCxGC	0.0578915
1,3-Cyclopentadiene, 5-methyl-	C6H8	80.0626	GCxGC	0.0480013
1,3-Cyclohexadiene	C6H8	80.0626	GCxGC	0.0344298
1H-Pyrrole, 1-methyl-	C5H7N	81.0578	GCxGC	0.00667637
1H-Pyrrole, 2-methyl-	C5H7N	81.0578	GCxGC	0.00440603
1H-Pyrrole, 3-methyl-	C5H7N	81.0578	GCxGC	0.00417638
Furan, 2-methyl-	C5H6O	82.0419	GCxGC	0.138991
Furan, 3-methyl-	C5H6O	82.0419	GCxGC	0.0128123
1,4-Pentadien-3-one	C5H6O	82.0419	GCxGC	0.000670334
3-Cyclopenten-1-one	C5H6O	82.0419	GCxGC	0.0107724
2-Cyclopenten-1-one	C5H6O	82.0419	GCxGC	0.036614
1,4-Pentadiene, 3-methyl-	C6H10	82.0783	GCxGC	0.00181604
1,4-Pentadiene, 2-methyl-	C6H10	82.0783	GCxGC	0.00526074
1,5-Hexadiene	C6H10	82.0783	GCxGC	0.00942417
trans-1,4-Hexadiene	C6H10	82.0783	GCxGC	0.0052575
1,4-Hexadiene, (Z)-	C6H10	82.0783	GCxGC	0.00350265
1,3-Pentadiene, 2-methyl-, (Z)-	C6H10	82.0783	GCxGC	0.0215882
Cyclopentene, 3-methyl-	C6H10	82.0783	GCxGC	0.00674971
1,3-Pentadiene, 2-methyl-, (E)-	C6H10	82.0783	GCxGC	0.00595414
1,3-Butadiene, 2,3-dimethyl-	C6H10	82.0783	GCxGC	0.00686966
1,3-Hexadiene,c&t	C6H10	82.0783	GCxGC	0.0117217
4-Methyl-1,3-pentadiene	C6H10	82.0783	GCxGC	0.0129327
Cyclopentene, 1-methyl-	C6H10	82.0783	GCxGC	0.0191257
1,3-Pentadiene, 3-methyl-, (Z)-	C6H10	82.0783	GCxGC	0.00797585
2,4-Hexadiene, (E,E)-	C6H10	82.0783	GCxGC	0.00442734
2,4-Hexadiene, (E,Z)-	C6H10	82.0783	GCxGC	0.00614569
Cyclohexene	C6H10	82.0783	GCxGC	0.0232695
C6H10 isomer	C6H10	82.0783	GCxGC	0.0116887
Butanenitrile, 2-methyl-	C5H9N	83.0735	GCxGC	0.00397716
Butanenitrile, 3-methyl-	C5H9N	83.0735	GCxGC	0.00787202
Thiophene	C4H4S	84.0034	GCxGC	0.00400067
2-Furanone	C4H4O2	84.0184	PTR	0.286629
Furan, 2,3-dihydro-5-methyl-	C5H8O	84.0575	GCxGC	0.00212543
2-Ethylacrolein	C5H8O	84.0575	GCxGC	0.00261104
3-Buten-2-one, 3-methyl-	C5H8O	84.0575	GCxGC	0.0339991
4-Penten-2-one	C5H8O	84.0575	GCxGC	0.00220271
2H-Pyran, 3,4-dihydro-	C5H8O	84.0575	GCxGC	0.00172581
3-Penten-2-one, (E)-	C5H8O	84.0575	GCxGC	0.00245412
1-Penten-3-one	C5H8O	84.0575	GCxGC	0.00246663
2-Butenal, 2-methyl-	C5H8O	84.0575	GCxGC	0.00587929
3-Penten-2-one, (E)-	C5H8O	84.0575	GCxGC	0.00561873
2-Pentenal, (E)-	C5H8O	84.0575	GCxGC	0.0015666
2-Butenal, 3-methyl-	C5H8O	84.0575	GCxGC	0.00214691
Cyclopentanone	C5H8O	84.0575	GCxGC	0.0143898
1-Pentene, 4-methyl-	C6H12	84.0939	GCxGC	0.00444121
1-Butene, 2,3-dimethyl-	C6H12	84.0939	GCxGC	0.0135301
1-Hexene	C6H12	84.0939	GCxGC	0.0991879
2-Hexene, (E)-	C6H12	84.0939	GCxGC	0.00784643
2-Pentene, 2-methyl-	C6H12	84.0939	GCxGC	0.0171401
3-Hexene, (E)-	C6H12	84.0939	GCxGC	0.00632785
2-Pentene, 3-methyl-, (Z)-	C6H12	84.0939	GCxGC	0.00639952
Cyclopentane, methyl-	C6H12	84.0939	GCxGC	0.00181079
2-Pentene, 4-methyl-	C6H12	84.0939	GCxGC	0.000835186
Acetic acid ethenyl ester	C4H6O2	86.0368	GCxGC	0.00534211
2,3-Butanedione	C4H6O2	86.0368	GCxGC	0.139377
2-Propenoic acid, methyl ester	C4H6O2	86.0368	GCxGC	0.00630316
Butanal, 3-methyl-	C5H10O	86.0732	GCxGC	0.0228807
2-Butanone, 3-methyl-	C5H10O	86.0732	GCxGC	0.00496391
Butanal, 2-methyl-	C5H10O	86.0732	GCxGC	0.00928403
2-Pentanone	C5H10O	86.0732	GCxGC	0.00608024
Pentanal	C5H10O	86.0732	GCxGC	0.0150678
Hexane	C6H14	86.1096	GCxGC	0.0150252
Unknown	C3H4O3	88	PTR	0.00527308
Ethyl acetate	C4H8O2	88.0497	PTR	0.0426862
Ethyl Acetate	C4H8O2	88.0524	GCxGC	0.0020623
Methyl propionate	C4H8O2	88.0524	GCxGC	0.00253229
Unknown	C7H6	90.0442	PTR	0.0795227
Ethyl nitrate	C2H5NO3	91.07	WAS	0.00119723
Toluene	C7H8	92.0626	GCxGC	0.402707
C7H8 isomer	C7H8	92.0626	GCxGC	0.00435897
C7H8 isomer	C7H8	92.0626	GCxGC	0.00492343
1,3,5-Cycloheptatriene	C7H8	92.0626	GCxGC	0.0014816
Vinylfuran	C6H6O	94.0419	GCxGC	0.0067241
Phenol	C6H6O	94.0419	GCxGC	0.167989
3-Methylpyridazine	C5H6N2	94.0531	GCxGC	0.0106451
Unknown	C7H10	94	PTR	0.380534
C7H10 isomer	C7H10	94.0783	GCxGC	0.00325884
C7H10 isomer	C7H10	94.0783	GCxGC	0.000359373
C7H10 isomer	C7H10	94.0783	GCxGC	0.000363319
C7H10 isomer	C7H10	94.0783	GCxGC	0.00265321
C7H10 isomer	C7H10	94.0783	GCxGC	0.00831472
C7H10 isomer	C7H10	94.0783	GCxGC	0.000851297
C7H10 isomer	C7H10	94.0783	GCxGC	0.00205766
1,4-Cyclohexadiene, 1-methyl-	C7H10	94.0783	GCxGC	0.0272127
C7H10 isomer	C7H10	94.0783	GCxGC	0.0210767
C7H10 isomer	C7H10	94.0783	GCxGC	0.00480017
C7H10 isomer	C7H10	94.0783	GCxGC	0.00312064
C7H10 isomer	C7H10	94.0783	GCxGC	0.00234046
C7H10 isomer	C7H10	94.0783	GCxGC	0.00665583
C7H10 isomer	C7H10	94.0783	GCxGC	0.00233042
1H-Pyrrole, 1-ethyl-	C6H9N	95.0735	GCxGC	0.00186584
1H-Pyrrole, 2,5-dimethyl	C6H9N	95.0735	GCxGC	0.00216177
3-Furaldehyde	C5H4O2	96.0211	GCxGC	0.00981381
Furfural	C5H4O2	96.0211	GCxGC	0.260344
2-Cyclopentene-1,4-dione	C5H4O2	96.0211	GCxGC	0.00919071
Unknown	C6H8O	96	PTR	0.174743
Furan, 2-ethyl-	C6H8O	96.0575	GCxGC	0.00728492
Furan, 2,5-dimethyl-	C6H8O	96.0575	GCxGC	0.0415902
Furan, 3-ethyl-	C6H8O	96.0575	GCxGC	0.000981906
Furan, 2,4-dimethyl-	C6H8O	96.0575	GCxGC	0.00287258
Furan, 2,3-dimethyl-	C6H8O	96.0575	GCxGC	0.00663371
2-Cyclopenten-1-one, 2-methyl-	C6H8O	96.0575	GCxGC	0.0111347
2-Cyclohexen-1-one	C6H8O	96.0575	GCxGC	0.00258315
C7H12 isomer	C7H12	96.0939	GCxGC	0.00235497
1,6-Heptadiene	C7H12	96.0939	GCxGC	0.00936232
C7H12 isomer	C7H12	96.0939	GCxGC	0.00234278
C7H12 isomer	C7H12	96.0939	GCxGC	0.00364251
3,5-Dimethylcyclopentene	C7H12	96.0939	GCxGC	0.00476301
C7H12 isomer	C7H12	96.0939	GCxGC	0.0020409
C7H12 isomer	C7H12	96.0939	GCxGC	0.00317704
C7H12 isomer	C7H12	96.0939	GCxGC	0.00361901
Cyclopentene, 3-ethyl-	C7H12	96.0939	GCxGC	0.00238974
Vinylcyclopentane	C7H12	96.0939	GCxGC	0.00503564
C7H12 isomer	C7H12	96.0939	GCxGC	0.00261652
Cyclohexene, 3-methyl-	C7H12	96.0939	GCxGC	0.00751837
Cyclohexene, 4-methyl-	C7H12	96.0939	GCxGC	0.00308845
Cyclopentene, 4,4-dimethyl-	C7H12	96.0939	GCxGC	0.00643201
C7H12 isomer	C7H12	96.0939	GCxGC	0.0031274
C7H12 isomer	C7H12	96.0939	GCxGC	0.00167414
C7H12 isomer	C7H12	96.0939	GCxGC	0.00262159
Cyclohexene, 1-methyl-	C7H12	96.0939	GCxGC	0.00526848
C7H12 isomer	C7H12	96.0939	GCxGC	0.00267953
C7H12 isomer	C7H12	96.0939	GCxGC	0.00253069
Pentanenitrile, 4-methyl-	C6H11N	97.0891	GCxGC	0.00454257
2-Furan Methanol	C5H6O2	98.0341	PTR	0.245397
2-Furan methanol	C5H6O2	98.0368	GCxGC	0.0641616
5-Hexen-2-one	C6H10O	98.0732	GCxGC	0.00174379
Cyclohexanone	C6H10O	98.0732	GCxGC	0.00353061
1-Hexene, 5-methyl-	C7H14	98.1096	GCxGC	0.00093091
1-Hexene, 4-methyl-	C7H14	98.1096	GCxGC	0.00124249
1-Butene, 2-ethyl-3-methyl-	C7H14	98.1096	GCxGC	0.00249753
1-Heptene	C7H14	98.1096	GCxGC	0.0500528
3-Heptene, (E)-	C7H14	98.1096	GCxGC	0.000678215
2-Hexene, 3-methyl-, (Z)-	C7H14	98.1096	GCxGC	0.00413996
2-Heptene, (E)-	C7H14	98.1096	GCxGC	0.00234087
2-Hexene, 3-methyl-, (Z)-	C7H14	98.1096	GCxGC	0.00168126
2-Heptene, (Z)	C7H14	98.1096	GCxGC	0.0037744
1-Butene, 2-ethyl-3-methyl-	C7H14	98.1096	GCxGC	0.00100019
Cyclopentane, ethyl-	C7H14	98.1096	GCxGC	0.00222128
Unknown	C4H4O3	100	PTR	0.0178625
Unknown	C5H8O2	100.05	PTR	0.0713082
2,3-Pentanedione	C5H8O2	100.052	GCxGC	0.015271
Acetic acid, 2-propenyl ester	C5H8O2	100.052	GCxGC	0.00316149
2-Hexanone	C6H12O	100.089	GCxGC	0.00400529
Hexanal	C6H12O	100.089	GCxGC	0.0132804
Heptane	C7H16	100.125	GCxGC	0.0134688
Unknown	C4H6O3	102	PTR	0.0303944
Unknown	C5H10O2	102	PTR	0.0345776
Phenylethyne	C8H6	102.047	GCxGC	0.0252763
Benzonitrile	C7H5N	103.042	GCxGC	0.0130928
Styrene	C8H8	104.063	GCxGC	0.110467
C8H8 isomer	C8H8	104.063	GCxGC	0.00188406
n-propyl nitrate	C3H7NO3	105.09	WAS	0.000315353
Benzaldehyde	C7H6O	106.042	GCxGC	0.0658118
Ethylbenzene	C8H10	106.078	GCxGC	0.0630485
m&p-Xylene	C8H10	106.078	GCxGC	0.131515
o-Xylene	C8H10	106.078	GCxGC	0.0519933
C8H10 isomer (non-aromatic)	C8H10	106.078	GCxGC	0.000981342
C8H10 isomer (non-aromatic)	C8H10	106.078	GCxGC	0.00136025
C8H10 isomer (non-aromatic)	C8H10	106.078	GCxGC	0.00232258
Unknown	C6H4O2	108.018	PTR	0.027617
Unknown	C7H8O	108	PTR	0.0969753
Furan, 2-(2-propenyl)-	C7H8O	108.058	GCxGC	0.00123912
Anisole	C7H8O	108.058	GCxGC	0.00331129
2-methyl phenol	C7H8O	108.058	GCxGC	0.0189408
3+4-methyl phenol	C7H8O	108.058	GCxGC	0.0241928
Unknown	C8H12	108	PTR	0.183556
C8H12 isomer	C8H12	108.094	GCxGC	0.0064878
C8H12 isomer	C8H12	108.094	GCxGC	0.00213577
C8H12 isomer	C8H12	108.094	GCxGC	0.00179756
C8H12 isomer	C8H12	108.094	GCxGC	0.00158692
C8H12 isomer	C8H12	108.094	GCxGC	0.00349768
C8H12 isomer	C8H12	108.094	GCxGC	0.000306925
C8H12 isomer	C8H12	108.094	GCxGC	0.00478307
C8H12 isomer	C8H12	108.094	GCxGC	0.00172659
C8H12 isomer	C8H12	108.094	GCxGC	0.00206242
1,5-Dimethyl-1,4-cyclohexadiene	C8H12	108.094	GCxGC	0.00161174
Catechol (Benzenediols); Methylfurfural	C6H6O2	110.034	PTR	0.214205
Furan, 2-acetyl-	C6H6O2	110.037	GCxGC	0.0102139
5-Methyl furfural	C6H6O2	110.037	GCxGC	0.0255963
Unknown	C7H10O	110.07	PTR	0.0321183
Furan, 2-propyl-	C7H10O	110.073	GCxGC	0.000957202
Furan, 2-ethyl-5-methyl-	C7H10O	110.073	GCxGC	0.00613262
Furan, 2,3,5-trimethyl-	C7H10O	110.073	GCxGC	0.00280921
1,7-Octadiene	C8H14	110.11	GCxGC	0.00659199
C8H14 isomer	C8H14	110.11	GCxGC	0.00197867
C8H14 isomer	C8H14	110.11	GCxGC	0.00183822
C8H14 isomer	C8H14	110.11	GCxGC	0.00132565
C8H14 isomer	C8H14	110.11	GCxGC	0.0054212
C8H14 isomer	C8H14	110.11	GCxGC	0.00232278
C8H14 isomer	C8H14	110.11	GCxGC	0.00240745
C8H14 isomer	C8H14	110.11	GCxGC	0.00138203
C8H14 isomer	C8H14	110.11	GCxGC	0.00160666
C8H14 isomer	C8H14	110.11	GCxGC	0.00131729
C8H14 isomer	C8H14	110.11	GCxGC	0.00106714
Unknown	C5H4O3	112.013	PTR	0.037574
2-Hydroxy-3-Methyl-2-Cyclopentenone	C6H8O2	112.05	PTR	0.109928
Cyclohexane, 1,4-dimethyl-	C8H16	112.125	GCxGC	0.00143897
1-Heptene, 2-methyl-	C8H16	112.125	GCxGC	0.000925457
1-Octene	C8H16	112.125	GCxGC	0.0285628
3-Octene, (E)-	C8H16	112.125	GCxGC	0.000959257
2-Methyl-2-heptene	C8H16	112.125	GCxGC	0.00127892
2-Octene, (E)-	C8H16	112.125	GCxGC	0.00350123
2-Octene, (Z)-	C8H16	112.125	GCxGC	0.00165887
Unknown	C5H6O3	114.029	PTR	0.0887016
Unknown	C6H10O2	114	PTR	0.0361606
C6 Diketone isomer	C6H10O2	114.068	GCxGC	0.00194105
C6 Diketone isomer	C6H10O2	114.068	GCxGC	0.00792928
2-Heptanone	C7H14O	114.105	GCxGC	0.00137727
Heptanal	C7H14O	114.105	GCxGC	0.00791377
Pentane, 2,3,3-trimethyl	C8H18	114.141	GCxGC	0.000548791
octane	C8H18	114.141	WAS	0.00897057
Unknown	C9H8	116.06	PTR	0.153588
Benzene,1-ethynyl-2-methyl-	C9H8	116.063	GCxGC	0.00376041
Benzene, 1-propynyl-	C9H8	116.063	GCxGC	0.00322967
Indene	C9H8	116.063	GCxGC	0.0517295
Benzofuran	C8H6O	118.042	GCxGC	0.0316222
Benzene, 2-propenyl-	C9H10	118.078	GCxGC	0.0046577
à-Methylstyrene	C9H10	118.078	GCxGC	0.0124067
Benzene, 1-propenyl-	C9H10	118.078	GCxGC	0.00342361
Benzene, 1-ethenyl-3-methyl-	C9H10	118.078	GCxGC	0.0403368
4-Methylstyrene	C9H10	118.078	GCxGC	0.0143024
Benzene, 1-propenyl-	C9H10	118.078	GCxGC	0.00715708
Indane	C9H10	118.078	GCxGC	0.00574316
2-Butyl nitrate	C4H9NO3	119.12	WAS	0.00134471
Benzeneacetaldehyde	C8H8O	120.058	GCxGC	0.00329829
Acetophenone	C8H8O	120.058	GCxGC	0.00571749
Benzaldehyde, 3-methyl-	C8H8O	120.058	GCxGC	0.028399
C9H12 isomer - non-aromatic	C9H12	120.094	GCxGC	0.00231872
C9H12 isomer - non-aromatic	C9H12	120.094	GCxGC	0.00307584
5-Methylenecycloocta-1,3-diene	C9H12	120.094	GCxGC	0.00119618
Benzene, isopropyl-	C9H12	120.094	GCxGC	0.00491485
Benzene, propyl-	C9H12	120.094	GCxGC	0.00894314
Benzene, 1-ethyl-3-methyl-	C9H12	120.094	GCxGC	0.0270109
Benzene, 1-ethyl-4-methyl-	C9H12	120.094	GCxGC	0.00685751
C9H12 isomer - non-aromatic	C9H12	120.094	GCxGC	0.00125173
Benzene, 1,3,5-trimethyl-	C9H12	120.094	GCxGC	0.0043086
Benzene, 1-ethyl-2-methyl-	C9H12	120.094	GCxGC	0.0106345
Benzene, 1,2,4-trimethyl-	C9H12	120.094	GCxGC	0.0120144
Benzene, 1,2,3-trimethyl-	C9H12	120.094	GCxGC	0.0170625
Salicylaldehyde	C7H6O2	122.034	PTR	0.016276
Xylenol (2,5-Dimethyl phenol)	C8H10O	122.07	PTR	0.0583426
4-Methylanisole	C8H10O	122.073	GCxGC	0.00405963
2,5-Dimethyl phenol	C8H10O	122.073	GCxGC	0.00641776
C9H14 isomer	C9H14	122.11	GCxGC	0.00151007
Santene	C9H14	122.11	GCxGC	0.14405
C9H14 isomer	C9H14	122.11	GCxGC	0.000739774
C9H14 isomer	C9H14	122.11	GCxGC	0.0131237
Unknown	C6H4O3	124	PTR	0.0157718
Guaiacol (2-Methoxyphenol)	C7H8O2	124.05	PTR	0.14813
o-Guaiacol	C7H8O2	124.052	GCxGC	0.0296352
Furan, 4-methyl-2-propyl- (or C8H12O isomer)	C8H12O	124.089	GCxGC	0.00105833
C9H16 isomer	C9H16	124.125	GCxGC	0.000484266
C9H16 isomer	C9H16	124.125	GCxGC	0.000824877
C9H16 isomer	C9H16	124.125	GCxGC	0.000480991
1,8-Nonadiene	C9H16	124.125	GCxGC	0.0139421
C9H16 isomer	C9H16	124.125	GCxGC	0.000514482
C9H16 isomer	C9H16	124.125	GCxGC	0.000689443
C9H16 isomer	C9H16	124.125	GCxGC	0.000905434
C9H16 isomer	C9H16	124.125	GCxGC	0.00116382
Hydroxymethylfurfural	C6H6O3	126.029	PTR	0.128395
Unknown	C7H10O2	126	PTR	0.0481033
C9H18 isomer	C9H18	126.141	GCxGC	0.00121211
C9H18 isomer	C9H18	126.141	GCxGC	0.000883842
1-Nonene	C9H18	126.141	GCxGC	0.0199352
4-Nonene, (Z)	C9H18	126.141	GCxGC	0.00102306
2-Nonene, (E)-	C9H18	126.141	GCxGC	0.0013329
Cyclohexane, propyl-	C9H18	126.141	GCxGC	0.00139215
Naphthalene	C10H8	128.06	PTR	0.219663
4-Phenylbut-3-ene-1-yne	C10H8	128.063	GCxGC	0.00343223
Naphthalene	C10H8	128.063	GCxGC	0.0777859
Octanal	C8H16O	128.12	GCxGC	0.0031754
nonane	C9H20	128.156	WAS	0.00915644
Assorted HCs inc. Dihydronaphthalene	C10H10	130.076	PTR	0.0734615
C10H10 isomer	C10H10	130.078	GCxGC	0.00211336
C10H10 isomer	C10H10	130.078	GCxGC	0.00290984
Benzene, 1-butynyl-	C10H10	130.078	GCxGC	0.0131632
1H-Indene, 1-methyl-	C10H10	130.078	GCxGC	0.0100674
C10H10 isomer	C10H10	130.078	GCxGC	0.00346223
Unknown	C9H8O	132	PTR	0.0408789
Methyl benzofuran isomer	C9H8O	132.058	GCxGC	0.00366761
Methyl benzofuran isomer	C9H8O	132.058	GCxGC	0.00744681
Methyl benzofuran isomer	C9H8O	132.058	GCxGC	0.00621657
C10H12 isomer	C10H12	132.094	GCxGC	0.00301446
C10H12 isomer	C10H12	132.094	GCxGC	0.00268318
C10H12 isomer	C10H12	132.094	GCxGC	0.00206994
C10H12 isomer	C10H12	132.094	GCxGC	0.00695942
C10H12 isomer	C10H12	132.094	GCxGC	0.00382793
C10H12 isomer	C10H12	132.094	GCxGC	0.0240145
C10H12 isomer	C10H12	132.094	GCxGC	0.00260977
C10H12 isomer	C10H12	132.094	GCxGC	0.00239202
C10H12 isomer	C10H12	132.094	GCxGC	0.00345927
C10H12 isomer	C10H12	132.094	GCxGC	0.00201057
3-pentyl nitrate	C5H11NO3	133.147	WAS	0.000451868
2-pentyl nitrate	C5H11NO3	133.147	WAS	0.000508946
3-methyl-2-butyl nitrate	C5H11NO3	133.147	WAS	0.000627858
Unknown	C8H6O2	134	PTR	0.00395478
Unknown	C9H10O	134	PTR	0.0205744
C10H14 isomer - non-aromatic	C10H14	134.11	GCxGC	0.00501143
C10H14 isomer	C10H14	134.11	GCxGC	0.00145598
C10H14 isomer - non-aromatic	C10H14	134.11	GCxGC	0.00300955
C10H14 isomer - non-aromatic	C10H14	134.11	GCxGC	0.00114171
C10H14 isomer - non-aromatic	C10H14	134.11	GCxGC	0.00276504
C10H14 isomer - non-aromatic	C10H14	134.11	GCxGC	0.00215752
m-Cymene	C10H14	134.11	GCxGC	0.00767529
p-Cymene	C10H14	134.11	GCxGC	0.0412995
C10H14 isomer - non-aromatic	C10H14	134.11	GCxGC	0.00368434
o-Cymene	C10H14	134.11	GCxGC	0.00119243
Benzene, 1,4-diethyl-	C10H14	134.11	GCxGC	0.00181763
Benzene, 1-methyl-3-propyl-	C10H14	134.11	GCxGC	0.00280852
Benzene, 1-methyl-4-propyl-	C10H14	134.11	GCxGC	0.00200597
Benzene, butyl-	C10H14	134.11	GCxGC	0.00594909
Benzene, 5-ethyl-1,3-dimethyl-	C10H14	134.11	GCxGC	0.00345494
Benzene, 1-methyl-2-propyl-	C10H14	134.11	GCxGC	0.00256606
Benzene, 2-ethyl-1,4-dimethyl-	C10H14	134.11	GCxGC	0.00214226
1,3-Dimethyl-4-ethylbenzene	C10H14	134.11	GCxGC	0.00347108
Benzene, 4-ethyl-1,2-dimethyl-	C10H14	134.11	GCxGC	0.00245848
C10H14 isomer - non-aromatic	C10H14	134.11	GCxGC	0.00368434
1,2-Dimethyl-3-ethylbenzene	C10H14	134.11	GCxGC	0.00204066
C10H14 isomer - non-aromatic	C10H14	134.11	GCxGC	0.00238481
Benzene, 1,2,3,5-tetramethyl-	C10H14	134.11	GCxGC	0.00697531
Unknown	C8H8O2	136	PTR	0.0547959
Terpenes (α-Pinene)	C10H16	136.122	PTR	5.0828
Bornylene	C10H16	136.125	GCxGC	0.010525
á-Myrcene	C10H16	136.125	GCxGC	0.00116148
gamma pyronene	C10H16	136.125	GCxGC	0.019882
Tricyclene	C10H16	136.125	GCxGC	0.195203
alpha-Pinene	C10H16	136.125	GCxGC	0.261328
C10H16 isomer	C10H16	136.125	GCxGC	0.00362185
Fenchene	C10H16	136.125	GCxGC	0.00584495
Camphene	C10H16	136.125	GCxGC	0.559357
1,3-Cyclopentadiene, 5,5-dimethyl-2-propyl-	C10H16	136.125	GCxGC	0.0218475
Cyclohexene, 4-ethenyl-1,4-dimethyl-	C10H16	136.125	GCxGC	0.0136723
C10H16 isomer	C10H16	136.125	GCxGC	0.00176042
C10H16 isomer	C10H16	136.125	GCxGC	0.00307841
C10H16 isomer	C10H16	136.125	GCxGC	0.00159937
Sabinene	C10H16	136.125	GCxGC	0.0246997
Beta-Pinene	C10H16	136.125	GCxGC	0.0688262
Beta-pyronene	C10H16	136.125	GCxGC	0.020043
Beta-Myrcene	C10H16	136.125	GCxGC	0.140289
C10H16 isomer	C10H16	136.125	GCxGC	0.00251602
Alpha-Phellandrene	C10H16	136.125	GCxGC	0.0160339
3-Carene	C10H16	136.125	GCxGC	0.136234
Alpha terpinene	C10H16	136.125	GCxGC	0.0164111
C10H16 isomer	C10H16	136.125	GCxGC	0.00270026
Limonene	C10H16	136.125	GCxGC	0.205494
Beta-Phellandrene	C10H16	136.125	GCxGC	0.00373971
C10H16 isomer	C10H16	136.125	GCxGC	0.00373971
(E)-Ocimene	C10H16	136.125	GCxGC	0.00580593
Gamma terpinene	C10H16	136.125	GCxGC	0.00581208
C10H16 isomer	C10H16	136.125	GCxGC	0.00373971
Terpinolene	C10H16	136.125	GCxGC	0.0368674
Allo-ocimene or a-pyronene	C10H16	136.125	GCxGC	0.00506078
Allo-ocimene or a-pyronene	C10H16	136.125	GCxGC	0.00242833
Unknown	C9H14O	138	PTR	0.0182305
Unknown	C8H10O2	138	PTR	0.0551829
C10H18 isomer	C10H18	138.141	GCxGC	0.00213606
C10H18 isomer	C10H18	138.141	GCxGC	0.00260912
C10H18 isomer	C10H18	138.141	GCxGC	0.000988236
1,9-Decadiene	C10H18	138.141	GCxGC	0.00541081
C10H18 isomer	C10H18	138.141	GCxGC	0.00270178
C10H18 isomer	C10H18	138.141	GCxGC	0.00258082
C10H18 isomer	C10H18	138.141	GCxGC	0.000527356
C10H18 isomer	C10H18	138.141	GCxGC	0.00355034
C10H18 isomer	C10H18	138.141	GCxGC	0.00116728
C10H18 isomer	C10H18	138.141	GCxGC	0.00832572
Unknown	C7H8O3	140	PTR	0.0217702
1-Decene	C10H20	140.156	GCxGC	0.0194185
C10H20 isomer	C10H20	140.156	GCxGC	0.00202104
methyl iodide	CH3I	141.939	WAS	9.93834e-05
Methyl-Naphthalenes	C11H10	142.076	PTR	0.0615417
Naphthalene, 2-methyl-	C11H10	142.078	GCxGC	0.0143281
Naphthalene, 1-methyl-	C11H10	142.078	GCxGC	0.0136151
C10H22 isomer	C10H22	142.172	GCxGC	0.00172665
Decane	C10H22	142.172	WAS	0.0126973
Unknown	C10H8O	144	PTR	0.0591517
C11H12 isomer	C11H12	144.094	GCxGC	0.00160335
C11H12 isomer	C11H12	144.094	GCxGC	0.00161681
C11H12 isomer	C11H12	144.094	GCxGC	0.00242752
C11H12 isomer	C11H12	144.094	GCxGC	0.00349645
Unknown	C10H10O	146	PTR	0.0242824
Benzofuran, -dimethyl- (isomer)	C10H10O	146.073	GCxGC	0.00317177
C11H14 isomer	C11H14	146.11	GCxGC	0.00431612
Unknown	C9H8O2	146	PTR	0.0117928
Unknown	C10H12O	146	PTR	0.0113398
C11H16 isomer	C11H16	148.125	GCxGC	0.00437966
C11H16 isomer	C11H16	148.125	GCxGC	0.00330376
Benzene, pentyl-	C11H16	148.125	GCxGC	0.00975808
Benzene, (1-methylbutyl)-	C11H16	148.125	GCxGC	0.00455164
Unknown	C9H10O2	150	PTR	0.0704602
Unknown	C11H18	150	PTR	0.0484306
C11H18 isomer	C11H18	150.141	GCxGC	0.00265951
Acenaphthylene	C12H8	152.063	GCxGC	0.0126645
Unknown	C12H8	152.063	PTR	0.061876
1,10-Undecadiene	C11H20	152.156	GCxGC	0.00298669
C11H20 isomer	C11H20	152.156	GCxGC	0.00144987
C11H20 isomer	C11H20	152.156	GCxGC	0.00161313
Unknown	C8H10O3	154	PTR	0.0228038
Biphenyl	C12H10	154.078	GCxGC	0.0060667
Naphthalene, 2-ethenyl-	C12H10	154.078	GCxGC	0.00475207
1-Undecene	C11H22	154.172	GCxGC	0.0126519
C11H22 isomer	C11H22	154.172	GCxGC	0.00124954
Unknown	C12H12	156	PTR	0.0372343
Naphthalene, 1-ethyl-	C12H12	156.094	GCxGC	0.00506108
Naphthalene, 1,3-dimethyl-	C12H12	156.094	GCxGC	0.00561212
Undecane	C11H24	156.188	GCxGC	0.00319354
Unknown	C10H10O2	162	PTR	0.017524
Benzene, hexyl-	C12H18	162.141	GCxGC	0.00292871
Unknown	C10H12O2	164	PTR	0.034168
Unknown	C9H10O3	166	PTR	0.0351324
C12H22 isomer	C12H22	166.172	GCxGC	0.0029308
1,11-Dodecadiene	C12H22	166.172	GCxGC	0.00939095
1-Dodecene	C12H24	168.188	GCxGC	0.0131323
Dodecane	C12H26	170.203	GCxGC	0.00285749
Unknown	C7H14O5	178	PTR	0.0140239
1,12-Tridecadiene	C13H24	180.33	GCxGC	0.00274087
1-Tridecene	C13H26	182.203	GCxGC	0.00698452
Tridecane	C13H28	184.219	GCxGC	0.00385407
1,13-Tetradecadiene	C14H26	194.203	GCxGC	0.00124054
Fenchyl acetate	C12H20O2	196.146	GCxGC	0.0109352
Bornyl acetate	C12H20O2	196.146	GCxGC	0.106053
1-Tetradecene	C14H28	196.219	GCxGC	0.00579478
Tetradecane	C14H30	198.235	GCxGC	0.000943559
à-Calacorene	C15H20	200.156	GCxGC	0.00348095
Calamenene	C15H22	202.172	GCxGC	0.00828316
à-Cubebene	C15H24	204.188	GCxGC	0.00468665
Copaene	C15H24	204.188	GCxGC	0.00406287
Cyclohexane, 1-ethenyl-1-methyl-2,4-bis(1-methylethenyl)-	C15H24	204.188	GCxGC	0.00955591
Germacrene D	C15H24	204.188	GCxGC	0.00453461
Caryophyllene	C15H24	204.188	GCxGC	0.00749508
1,6-Cyclodecadiene, 1-methyl-5-methylene-8-(1-methylethyl)-, [s-(E,E)]-	C15H24	204.188	GCxGC	0.00492989
Cadinadiene isomer	C15H24	204.188	GCxGC	0.0104236
Cadinadiene isomer	C15H24	204.188	GCxGC	0.0104249
Cadinadiene isomer	C15H24	204.188	GCxGC	0.0363407
Cadinadiene isomer	C15H24	204.188	GCxGC	0.0063523
Tribromomethane	CHBr3	252.73	WAS	0.000189597
Total EF				1817.66
Total NMOG EF				37.2721
Sum of Positively or Tentatively Identified Compounds				32.3437
Percent of Positively or Tentatively Identified Compounds				0.867772

## Sheet: Chinese Rice Straw
Compound Name	Formula	Mass (g/mol)	Instrument	EF (g/kg)
Methane	CH4	16	FTIR	2.19022
Carbon monoxide	CO	28	FTIR	56.4066
Carbon dioxide	CO2	44	FTIR	1429.46
Acetylene	C2H2	26	FTIR	0.17341
Hydrogen Cyanide	HCN	27	FTIR	0.219507
Ethene	C2H4	28	FTIR	0.953254
Formaldehyde	HCHO	30	FTIR	0.328195
Ethane	C2H6	30.069	WAS	0.32016
Methanol	CH3OH	32	FTIR	0.337946
Propyne	C3H4	40	PTR	0.191846
1,2-Propadiene	C3H4	40.06	WAS	0.00894574
Acetonitirile	C2H3N	41	PTR	0.0560299
Propene	C3H6	42	FTIR	0.36327
Ketene Fragments	C2H2O	42	PTR	0.43103
Acetaldehyde	C2H4O	44	PTR	0.529764
Propane	C3H8	44.096	WAS	0.129732
Formic acid	HCOOH	46	FTIR	0.0202909
Unknown	C2H6O	46	PTR	0.0121541
1,3-Butadiyne	C4H2	50	PTR	0.00140785
Methyl chloride	CH3Cl	50.488	WAS	0.101402
Butenyne	C4H4	52	PTR	0.0196491
Acrylonitrile	C3H3N	53.0265	GCxGC	0.00945975
2-Propynal	C3H2O	54	PTR	0.00828228
1,3-Butadiene	C4H6	54.091	WAS	0.141164
2-Butyne	C4H6	54.047	GCxGC	0.000702938
Propanenitrile	C3H5N	55.0422	GCxGC	0.00907095
Acrolein	C3H4O	56.0262	GCxGC	0.0616245
1-Butene	C4H8	56.107	WAS	0.0775149
i-Butene	C4H8	56.107	WAS	0.0600797
t-2-Butene	C4H8	56.107	WAS	0.026115
c-2-Butene	C4H8	56.107	WAS	0.0233224
Acetone	C3H6O	58	PTR	0.301698
Propanal	C3H6O	58.0419	GCxGC	0.0129442
2-Propen-1-ol	C3H6O	58.0419	GCxGC	0.00650695
i-Butane	C4H10	58.123	WAS	0.0125102
n-Butane	C4H10	58.123	WAS	0.0432385
Unknown	C3H9N	59	PTR	0.00179206
Acetic Acid	CH3COOH	60	FTIR	0.568286
Glycolaldehyde	C2H4O2	60	FTIR	0.0160563
Isopropyl Alcohol	C3H8O	60.0575	GCxGC	0.00754798
Carbonyl Sulfide	OCS	60.07	WAS	0.013495
Dimethyl Sulfide	C2H6S	62	PTR	0.00833444
Dimethyl Sulfide	C2H6S	62.129	WAS	0.00098622
Unknown	C5H4	64	PTR	0.00128841
1-Buten-3-yne, 2-methyl-	C5H6	66.047	GCxGC	0.000196484
4-Penten-1-yne	C5H6	66.047	GCxGC	0.000358804
1,3-Cyclopentadiene	C5H6	66.047	GCxGC	0.0360163
3-Penten-1-yne, (E)-	C5H6	66.047	GCxGC	0.000137841
1-Penten-3-yne	C5H6	66.047	GCxGC	0.000911929
3-Penten-1-yne, (Z)-	C5H6	66.047	GCxGC	0.00286201
Methacrylonitrile	C4H5N	67.0422	GCxGC	0.00510447
3-Butenenitrile	C4H5N	67.0422	GCxGC	0.00361537
2-Butenenitrile	C4H5N	67.0422	GCxGC	0.0026056
Pyrrole	C4H5N	67.0422	GCxGC	0.0497613
Carbon suboxide	C3O2	68	PTR	0.00102381
Furan	C4H4O	68	FTIR	0.107483
1-Butyne, 3-methyl-	C5H8	68.0626	GCxGC	3.94126e-05
1,4-Pentadiene	C5H8	68.0626	GCxGC	0.00359103
Isoprene	C5H8	68.0626	GCxGC	0.0881339
1-Pentyne	C5H8	68.0626	GCxGC	0.000200474
1,3-Pentadiene, (E)-	C5H8	68.0626	GCxGC	0.0209602
1,3-Pentadiene, (Z)-	C5H8	68.0626	GCxGC	0.015676
Cyclopentene	C5H8	68.0626	GCxGC	0.00719835
2-Pentyne	C5H8	68.0626	GCxGC	0.000814787
Isobutyronitrile	C4H7N	69.0578	GCxGC	0.00398659
Butanenitrile	C4H7N	69.0578	GCxGC	0.00269568
Unknown	C3H2O2	70	PTR	0.000589182
Methacrolein	C4H6O	70.0419	GCxGC	0.0226932
Furan, 2,5-dihydro	C4H6O	70.0419	GCxGC	0.000532002
2,3-Dihydrofuran	C4H6O	70.0419	GCxGC	0.00592106
Methyl vinyl ketone	C4H6O	70.0419	GCxGC	0.126509
2-Butenal	C4H6O	70.0419	GCxGC	0.0424792
1-Pentene	C5H10	70.0783	WAS	0.0162147
t-2-Pentene	C5H10	70.0783	WAS	0.0133866
c-2-Pentene	C5H10	70.0783	WAS	0.00839018
3-Methyl-1-Butene	C5H10	70.0783	WAS	0.0103699
2-Methyl-1-Butene	C5H10	70.0783	WAS	0.0140465
2-Methyl-2-Butene	C5H10	70.0783	WAS	0.0148006
Cyclopentane	C5H10	70.0783	WAS	0.00245106
Methylglyoxal	C3H4O2	72	PTR	0.0356005
Propanal, 2-methyl-	C4H8O	72.0575	GCxGC	0.0130037
Butanal	C4H8O	72.0575	GCxGC	0.016001
2-Butanone	C4H8O	72.0575	GCxGC	0.0675573
Furan, tetrahydro-	C4H8O	72.0575	GCxGC	0.00141311
Butane, 2-methyl-	C5H12	72.0939	GCxGC	0.00118635
Pentane	C5H12	72.0939	GCxGC	0.008589
Acetic acid, methyl ester	C3H6O2	74.0368	GCxGC	0.0388121
Hydroxyacetone	C3H6O2	74.0368	GCxGC	0.110161
1-Butanol	C4H10O	74.0732	GCxGC	0.00575618
Unknown	C3H8S	76	PTR	0.00270586
carbon Disulfide	CS2	76.14	WAS	0.0195736
Methyl nitrate	CH3NO3	77.04	WAS	0.000419729
1,5-Hexadien-3-yne	C6H6	78.047	GCxGC	0.00231835
Benzene	C6H6	78.113	WAS	0.166867
Pyridine	C5H5N	79.0422	GCxGC	0.0190559
2,4-Cyclopentadiene-1-one	C5H4O	80	PTR	0.0513324
Pyrazine	C4H4N2	80.0374	GCxGC	0.002897
1-Hexen-3-yne	C6H8	80.0626	GCxGC	0.00080844
1,3-Cyclopentadiene, 1-methyl-	C6H8	80.0626	GCxGC	0.0134139
1,3-Cyclopentadiene, 5-methyl-	C6H8	80.0626	GCxGC	0.0113103
1,3-Cyclohexadiene	C6H8	80.0626	GCxGC	0.00669039
2-Hexene-4-yne	C6H8	80.0626	GCxGC	0.000332984
Butanenitrile, 2-methylene-	C5H7N	81.0578	GCxGC	0.00127114
1H-Pyrrole, 1-methyl-	C5H7N	81.0578	GCxGC	0.00574074
3-Butenenitrile, 3-methyl-	C5H7N	81.0578	GCxGC	0.00137022
1H-Pyrrole, 2-methyl-	C5H7N	81.0578	GCxGC	0.00679378
1H-Pyrrole, 3-methyl-	C5H7N	81.0578	GCxGC	0.00383395
Furan, 2-methyl-	C5H6O	82.0419	GCxGC	0.066183
Furan, 3-methyl-	C5H6O	82.0419	GCxGC	0.00764479
1,4-Pentadien-3-one	C5H6O	82.0419	GCxGC	0.000513591
3-Cyclopenten-1-one	C5H6O	82.0419	GCxGC	0.00393993
2-Cyclopenten-1-one	C5H6O	82.0419	GCxGC	0.0620274
1,4-Pentadiene, 3-methyl-	C6H10	82.0783	GCxGC	0.000507631
1,4-Pentadiene, 2-methyl-	C6H10	82.0783	GCxGC	0.00155798
1,5-Hexadiene	C6H10	82.0783	GCxGC	0.00181649
trans-1,4-Hexadiene	C6H10	82.0783	GCxGC	0.0009679
1,3-Pentadiene, 2-methyl-, (E)-	C6H10	82.0783	GCxGC	0.00956721
Cyclopentene, 3-methyl-	C6H10	82.0783	GCxGC	0.00312202
1,3-Butadiene, 2,3-dimethyl-	C6H10	82.0783	GCxGC	0.0024929
1,3-Hexadiene,c&t	C6H10	82.0783	GCxGC	0.00344371
1,3-Pentadiene, 2-methyl-, (E)-	C6H10	82.0783	GCxGC	0.00489536
1,3-Pentadiene, 4-methyl-	C6H10	82.0783	GCxGC	0.00392826
Cyclopentene, 1-methyl-	C6H10	82.0783	GCxGC	0.00882823
1,3-Pentadiene, 3-methyl-, (Z)-	C6H10	82.0783	GCxGC	0.00378462
2,4-Hexadiene, (E,E)-	C6H10	82.0783	GCxGC	0.00190589
2,4-Hexadiene, (E,Z)-	C6H10	82.0783	GCxGC	0.00253673
Cyclohexene	C6H10	82.0783	GCxGC	0.00380614
Butanenitrile, 2-methyl-	C5H9N	83.0735	GCxGC	0.00195082
Butanenitrile, 3-methyl-	C5H9N	83.0735	GCxGC	0.00475331
Pentanenitrile	C5H9N	83.0735	GCxGC	0.00100226
2-Furanone	C4H4O2	84	PTR	0.0448383
Thiophene	C4H4S	84.0034	GCxGC	0.00261271
Furan, 2,3-dihydro-5-methyl-	C5H8O	84.0575	GCxGC	0.00122325
2-Ethylacrolein	C5H8O	84.0575	GCxGC	0.00260446
3-Buten-2-one, 3-methyl-	C5H8O	84.0575	GCxGC	0.0233335
4-Penten-2-one	C5H8O	84.0575	GCxGC	0.00247274
4-pentenal	C5H8O	84.0575	GCxGC	0.00080657
1-Penten-3-one	C5H8O	84.0575	GCxGC	0.00835149
3-Penten-2-one (Z)	C5H8O	84.0575	GCxGC	0.00388822
C5H8O isomer	C5H8O	84.0575	GCxGC	0.00110638
2-Butenal, 2-methyl-	C5H8O	84.0575	GCxGC	0.00248109
3-pentene-2-one (E)	C5H8O	84.0575	GCxGC	0.0135482
2-Butenal, 3-methyl-	C5H8O	84.0575	GCxGC	0.000876735
2-Pentenal	C5H8O	84.0575	GCxGC	0.000433564
Cyclopentanone	C5H8O	84.0575	GCxGC	0.025107
1-Pentene, 4-methyl-	C6H12	84.0939	GCxGC	0.0025721
1-Butene, 2,3-dimethyl-	C6H12	84.0939	GCxGC	0.00607456
1-Hexene	C6H12	84.0939	GCxGC	0.0237991
2-Hexene, (E)-	C6H12	84.0939	GCxGC	0.00339456
2-Pentene, 2-methyl-	C6H12	84.0939	GCxGC	0.0073991
2-Pentene, 3-methyl-, (Z)-	C6H12	84.0939	GCxGC	0.00407048
2-Pentene, 3-methyl-, (E)-	C6H12	84.0939	GCxGC	0.00355106
Cyclopentane, methyl-	C6H12	84.0939	GCxGC	0.000704913
2-pentene, 4-methyl	C6H12	84.0939	GCxGC	0.000259627
2,3-Butanedione	C4H6O2	86.0368	GCxGC	0.055928
2-Propenoic acid, methyl ester	C4H6O2	86.0368	GCxGC	0.00245735
Butyrolactone	C4H6O2	86.0368	GCxGC	0.0151588
Butanal, 3-methyl-	C5H10O	86.0732	GCxGC	0.00809429
2-Butanone, 3-methyl-	C5H10O	86.0732	GCxGC	0.0070832
Butanal, 2-methyl-	C5H10O	86.0732	GCxGC	0.00497179
2-Pentanone	C5H10O	86.0732	GCxGC	0.0168599
3-Pentanone	C5H10O	86.0732	GCxGC	0.00627692
Pentane, 2-methyl-	C6H14	86.1096	GCxGC	0.00117896
Hexane	C6H14	86.1096	GCxGC	0.00370872
Unknown	C3H4O3	88	PTR	0.000966203
Ethyl Acetate	C4H8O2	88.0524	GCxGC	0.000531648
Methyl propionate	C4H8O2	88.0524	GCxGC	0.00434784
2-Butanone, 3-hydroxy-	C4H8O2	88.0524	GCxGC	0.00499559
1-Hydroxy-2-butanone	C4H8O2	88.0524	GCxGC	0.0065424
Unknown	C7H6	90	PTR	0.0154261
C7H8 isomer	C7H8	92.0626	GCxGC	0.000865116
C7H8 isomer	C7H8	92.0626	GCxGC	0.000510111
Toluene	C7H8	92.0626	GCxGC	0.140666
1,3,5-cycloheptatriene	C7H8	92.0626	GCxGC	0.00075093
Pyridine, 2-methyl-	C6H7N	93.0578	GCxGC	0.00609036
Pyridine, 3-methyl-	C6H7N	93.0578	GCxGC	0.00244114
Vinylfuran	C6H6O	94.0419	GCxGC	0.00508379
Phenol	C6H6O	94.0419	GCxGC	0.255106
Pyrazine, methyl-	C5H6N2	94.0531	GCxGC	0.00342471
3-Methylpyridazine	C5H6N2	94.0531	GCxGC	0.00591536
C7H10 isomer	C7H10	94.0783	GCxGC	0.000141554
C7H10 isomer	C7H10	94.0783	GCxGC	0.000419224
C7H10 isomer	C7H10	94.0783	GCxGC	0.000986042
C7H10 isomer	C7H10	94.0783	GCxGC	0.000534657
C7H10 isomer	C7H10	94.0783	GCxGC	0.000604759
C7H10 isomer	C7H10	94.0783	GCxGC	0.000704594
C7H10 isomer	C7H10	94.0783	GCxGC	0.000244131
C7H10 isomer	C7H10	94.0783	GCxGC	0.000722996
C7H10 isomer	C7H10	94.0783	GCxGC	0.0012708
Methyl bromide	CH3Br	94.939	WAS	0.000383145
1H-Pyrrole, 1-ethyl-	C6H9N	95.0735	GCxGC	0.00162552
1H-Pyrrole, 2,4-dimethyl-	C6H9N	95.0735	GCxGC	0.00138012
1H-Pyrrole, 2,5-dimethyl-	C6H9N	95.0735	GCxGC	0.00119636
1H-Pyrrole, 2-ethyl-	C6H9N	95.0735	GCxGC	0.00113156
3-Furaldehyde	C5H4O2	96.0211	GCxGC	0.00948045
Furfural	C5H4O2	96.0211	GCxGC	0.19527
3-Cyclopentene-1,2-dione	C5H4O2	96.0211	GCxGC	0.00428628
2-Cyclopentene-1,4-dione	C5H4O2	96.0211	GCxGC	0.00565521
Furan, 2-ethyl-	C6H8O	96.0575	GCxGC	0.0067653
Furan, 2,5-dimethyl-	C6H8O	96.0575	GCxGC	0.0270483
Furan, 3-ethyl-	C6H8O	96.0575	GCxGC	0.000530615
Furan, 2,4-dimethyl-	C6H8O	96.0575	GCxGC	0.00373454
Furan, 2,3-dimethyl-	C6H8O	96.0575	GCxGC	0.00181026
2,4-Hexadienal, (E,E)-	C6H8O	96.0575	GCxGC	0.0041778
2-Cyclopenten-1-one, 2-methyl-	C6H8O	96.0575	GCxGC	0.0257361
2-Cyclohexen-1-one	C6H8O	96.0575	GCxGC	0.00237728
2-Cyclopenten-1-one, 3-methyl-	C6H8O	96.0575	GCxGC	0.00482423
C7H12 isomer	C7H12	96.0939	GCxGC	0.000681767
C7H12 isomer	C7H12	96.0939	GCxGC	0.000875233
1,6 - Heptadiene	C7H12	96.0939	GCxGC	0.000481289
C7H12 isomer	C7H12	96.0939	GCxGC	0.000493131
C7H12 isomer	C7H12	96.0939	GCxGC	0.0011212
3,5-Dimethylcyclopentene	C7H12	96.0939	GCxGC	0.00197518
3-Heptyne	C7H12	96.0939	GCxGC	0.000476861
C7H12 isomer	C7H12	96.0939	GCxGC	0.00194036
C7H12 isomer	C7H12	96.0939	GCxGC	0.000927576
Cyclopentene, 3-ethyl-	C7H12	96.0939	GCxGC	0.000684163
Vinylcyclopentane	C7H12	96.0939	GCxGC	0.000582964
C7H12 isomer	C7H12	96.0939	GCxGC	0.000663979
C7H12 isomer	C7H12	96.0939	GCxGC	0.000987973
Cyclohexene, 3-methyl-	C7H12	96.0939	GCxGC	0.00247942
C7H12 isomer	C7H12	96.0939	GCxGC	0.000458021
Cyclopentene, 4,4-dimethyl-	C7H12	96.0939	GCxGC	0.00168597
Cyclopentene, 3-ethyl-	C7H12	96.0939	GCxGC	0.000905245
C7H12 isomer	C7H12	96.0939	GCxGC	0.00139179
C7H12 isomer	C7H12	96.0939	GCxGC	0.000707116
Cyclohexene, 1-methyl-	C7H12	96.0939	GCxGC	0.00158532
C7H12 isomer	C7H12	96.0939	GCxGC	0.00093729
Cyclopentene, 3-ethyl-	C7H12	96.0939	GCxGC	0.000389925
C7H12 isomer	C7H12	96.0939	GCxGC	0.000736444
Pentanenitrile, 4-methyl-	C6H11N	97.0891	GCxGC	0.0027178
Unknown	C4H2O3	98	PTR	0.00237188
Thiophene, 2-methyl-	C5H6S	98.019	GCxGC	0.000794753
Thiophene, 3-methyl-	C5H6S	98.019	GCxGC	0.00060586
2-Furanmethanol	C5H6O2	98.0368	GCxGC	0.1204
2-Pentanone, 3-methylene-	C6H10O	98.0732	GCxGC	0.000892662
1-Penten-3-one, 2-methyl-	C6H10O	98.0732	GCxGC	0.00169554
5-Hexen-3-one	C6H10O	98.0732	GCxGC	0.000457897
5-Hexen-2-one	C6H10O	98.0732	GCxGC	0.000915386
1-Hexen-3-one	C6H10O	98.0732	GCxGC	0.000576563
4-Hexen-3-one	C6H10O	98.0732	GCxGC	0.00063676
4-Penten-2-one, 3-methyl-	C6H10O	98.0732	GCxGC	0.000788917
3-Penten-2-one, 4-methyl-	C6H10O	98.0732	GCxGC	0.000557258
4-Penten-2-one, 3-methyl-	C6H10O	98.0732	GCxGC	0.000527818
4-Hexen-3-one	C6H10O	98.0732	GCxGC	0.00221295
Cyclopentanone, 2-methyl-	C6H10O	98.0732	GCxGC	0.00792778
3-hexen-2-one	C6H10O	98.0732	GCxGC	0.000996873
3-Methylcyclopentanone	C6H10O	98.0732	GCxGC	0.00326448
Cyclohexanone	C6H10O	98.0732	GCxGC	0.00166218
1-Hexene, 3-methyl-	C7H14	98.1096	GCxGC	0.000349932
1-Hexene, 5-methyl-	C7H14	98.1096	GCxGC	0.00036732
1-Pentene, 2,3-dimethyl-	C7H14	98.1096	GCxGC	0.00036979
3-Methyl-2-hexene	C7H14	98.1096	GCxGC	0.00211809
1-Heptene	C7H14	98.1096	GCxGC	0.013468
3-Heptene, (E)-	C7H14	98.1096	GCxGC	0.000141851
2-Hexene, 3-methyl-, (Z)-	C7H14	98.1096	GCxGC	0.00152631
2-Hexene, 3-methyl-, (E)-	C7H14	98.1096	GCxGC	0.000728172
2-Heptene, Z	C7H14	98.1096	GCxGC	0.000335591
C7H14 isomer	C7H14	98.1096	GCxGC	0.000352586
Cyclopentane, ethyl-	C7H14	98.1096	GCxGC	0.000364427
Unknown	C4H4O3	100	PTR	0.00233997
2,3-Pentanedione	C5H8O2	100.052	GCxGC	0.015448
Acetic acid, 2-propenyl ester	C5H8O2	100.052	GCxGC	0.00112962
2-Butenoic acid, methyl ester	C5H8O2	100.052	GCxGC	0.000761663
Methyl Isobutyl Ketone	C6H12O	100.089	GCxGC	0.000950283
3-Pentanone, 2-methyl-	C6H12O	100.089	GCxGC	0.000267962
2-Pentanone, 3-methyl-	C6H12O	100.089	GCxGC	0.000946265
3-Hexanone	C6H12O	100.089	GCxGC	0.00195436
2-Hexanone	C6H12O	100.089	GCxGC	0.00260619
Hexanal	C6H12O	100.089	GCxGC	0.00154088
Hexane, 2-methyl-	C7H16	100.125	GCxGC	7.56351e-05
Heptane	C7H16	100.125	GCxGC	0.00279831
Acetic anhydride	C4H6O3	102.032	GCxGC	0.0073942
Phenylacetylene	C8H6	102.047	GCxGC	0.0054741
Unknown	C5H10O2	102	PTR	0.00425978
Butanoic acid, methyl ester	C5H10O2	102.068	GCxGC	0.00151563
Benzonitrile	C7H5N	103.042	GCxGC	0.0126558
Styrene	C8H8	104.063	GCxGC	0.0276125
C8H8 isomer	C8H8	104.063	GCxGC	0.000229043
Benzaldehyde	C7H6O	106.042	GCxGC	0.0201867
Ethyl benzene	C8H10	106.167	WAS	0.0278498
m&p-Xylene	C8H10	106.167	WAS	0.0669823
o-Xylene	C8H10	106.167	WAS	0.0207088
Unknown	C6H4O2	108	PTR	0.0168326
Furan, 2-(1-propenyl)-	C7H8O	108.058	GCxGC	0.000641746
Furan, 2-(2-propenyl)-	C7H8O	108.058	GCxGC	0.000903982
Anisole	C7H8O	108.058	GCxGC	0.00150077
Cyclopentanone, 3,4-bis(methylene)-	C7H8O	108.058	GCxGC	0.000850435
Phenol, 2-methyl-	C7H8O	108.058	GCxGC	0.0429722
Phenol, 3&4-methyl-	C7H8O	108.058	GCxGC	0.0271373
Furan, 2-acetyl-	C6H6O2	110.037	GCxGC	0.0176269
5-methyl furfural	C6H6O2	110.037	GCxGC	0.0422703
Unknown	C7H10O	110	PTR	0.0413312
Furan, 2-propyl-	C7H10O	110.073	GCxGC	0.000374321
Furan, 2-ethyl-5-methyl-	C7H10O	110.073	GCxGC	0.00599616
Furan, 2,3,5-trimethyl-	C7H10O	110.073	GCxGC	0.00133652
2-Cyclopenten-1-one, 3,4-dimethyl-	C7H10O	110.073	GCxGC	0.00453467
3-methyl-3-cyclohexen-1-one	C7H10O	110.073	GCxGC	0.00181668
2-Cyclopenten-1-one, 2,3-dimethyl-	C7H10O	110.073	GCxGC	0.00325093
C7H10O isomer	C7H10O	110.073	GCxGC	0.00164744
1,7-Octadiene	C8H14	110.11	GCxGC	0.000796357
C8H14 isomer	C8H14	110.11	GCxGC	0.000422104
C8H14 isomer	C8H14	110.11	GCxGC	0.000731162
C8H14 isomer	C8H14	110.11	GCxGC	0.000346128
Cyclopentene, 3-propyl-	C8H14	110.11	GCxGC	0.00041245
C8H14 isomer	C8H14	110.11	GCxGC	0.000768859
C8H14 isomer	C8H14	110.11	GCxGC	0.000871557
C8H14 isomer	C8H14	110.11	GCxGC	0.000283414
C8H14 isomer	C8H14	110.11	GCxGC	0.000337952
Unknown	C5H4O3	112	PTR	0.00218098
2-Hydroxy-3-Methyl-2-Cyclopentenone	C6H8O2	112	PTR	0.0451136
Cyclopentanone, 2-ethyl-	C7H12O	112.089	GCxGC	0.000943102
1-Hexene, 2,5-dimethyl-	C8H16	112.125	GCxGC	0.000309559
2-Heptene, 6-methyl-	C8H16	112.125	GCxGC	0.000499197
Cyclohexane, 1,4-dimethyl	C8H16	112.125	GCxGC	0.000458373
1-Heptene, 2-methyl-	C8H16	112.125	GCxGC	0.000181699
1-Octene	C8H16	112.125	GCxGC	0.00810928
2-Heptene, 2-methyl-	C8H16	112.125	GCxGC	0.00043366
2-Octene (E)	C8H16	112.125	GCxGC	0.000468409
2-Octene (Z)	C8H16	112.125	GCxGC	0.000198959
Unknown	C5H6O3	114	PTR	0.00749313
2,3-Pentanedione, 4-methyl	C6H10O2	114.068	GCxGC	0.001932
3,4-Hexanedione	C6H10O2	114.068	GCxGC	0.000619886
2,3-Pentanedione, 4-methyl-	C6H10O2	114.068	GCxGC	0.00323537
3-Pentanone, 2,4-dimethyl	C7H14O	114.105	GCxGC	0.0015441
2-Heptanone	C7H14O	114.105	GCxGC	0.000966914
Hexane, 2,3-dimethyl-	C8H18	114.141	GCxGC	0.000129296
Octane	C8H18	114.141	GCxGC	0.00147243
Unknown	C9H8	116	PTR	0.0321708
Benzene, 1-ethynyl-2-methyl	C9H8	116.063	GCxGC	0.000402836
Indene	C9H8	116.063	GCxGC	0.0143875
Benzofuran	C8H6O	118.042	GCxGC	0.0193483
Benzene, 2-propenyl-	C9H10	118.078	GCxGC	0.00125441
à-Methylstyrene	C9H10	118.078	GCxGC	0.00226135
cis-1-Propenylbenzene	C9H10	118.078	GCxGC	0.00117793
Benzene, 1-ethenyl-3-methyl-	C9H10	118.078	GCxGC	0.00993548
Benzene, 1-ethenyl-4-methyl-	C9H10	118.078	GCxGC	0.00235794
Benzene, 1-propenyl- trans	C9H10	118.078	GCxGC	0.00236247
Indane	C9H10	118.078	GCxGC	0.00233806
Vinylphenol	C8H8O	120	PTR	0.0707576
Benzeneacetaldehyde	C8H8O	120.058	GCxGC	0.000789594
Acetophenone	C8H8O	120.058	GCxGC	0.00479996
m-Tolualdehyde	C8H8O	120.058	GCxGC	0.0073144
Benzofuran, 2,3-dihydro-	C8H8O	120.058	GCxGC	0.00111778
Benzene, isopropyl-	C9H12	120.094	GCxGC	0.000788272
Benzene, propyl-	C9H12	120.094	GCxGC	0.00214437
Benzene, 1-ethyl-3-methyl-	C9H12	120.094	GCxGC	0.00644707
Benzene, 1-ethyl-4-methyl-	C9H12	120.094	GCxGC	0.00256291
Benzene, 1,3,5-trimethyl-	C9H12	120.094	GCxGC	0.00234879
Benzene, 1-ethyl-2-methyl-	C9H12	120.094	GCxGC	0.00288381
Benzene, 1,2,4-trimethyl-	C9H12	120.094	GCxGC	0.00589435
Benzene, 1,2,3-trimethyl-	C9H12	120.094	GCxGC	0.00307527
Salicylaldehyde	C7H6O2	122	PTR	0.0284444
1,3-Benzodioxole	C7H6O2	122.037	GCxGC	0.00126019
Salicyladehyde	C7H6O2	122.037	GCxGC	0.00641916
Xylenol (2,5-Dimethyl phenol)	C8H10O	122	PTR	0.0493021
4-methyl anisole	C8H10O	122.073	GCxGC	0.00166074
Phenol, 2,6-dimethyl-	C8H10O	122.073	GCxGC	0.00381188
Phenol, dimethyl (isomer)	C8H10O	122.073	GCxGC	0.00398387
Phenol, 2,5-dimethyl-	C8H10O	122.073	GCxGC	0.00396369
C9H14 isomer	C9H14	122.11	GCxGC	0.000278005
Unknown	C6H4O3	124	PTR	0.00551906
Unknown	C8H10O	124	PTR	0.0117457
Guaiacol (2-Methoxyphenol)	C7H8O2	124	PTR	0.0321432
2-Propionylfuran	C7H8O2	124.052	GCxGC	0.00154608
2-Acetyl-5-methylfuran	C7H8O2	124.052	GCxGC	0.00193534
o-Guaiacol	C7H8O2	124.052	GCxGC	0.0105842
C9H16 isomer	C9H16	124.125	GCxGC	0.000310831
1,8 nonadiene	C9H16	124.125	GCxGC	0.000743326
C9H16 isomer	C9H16	124.125	GCxGC	0.000519844
C9H16 isomer	C9H16	124.125	GCxGC	0.000449039
C9H16 isomer	C9H16	124.125	GCxGC	0.000323724
Unknown	C7H10O2	126	PTR	0.00953857
Hydroxymethylfurfural	C6H6O3	126	PTR	0.00967964
Methyl 2-furoate	C6H6O3	126.032	GCxGC	0.00159053
C9H18 isomer	C9H18	126.141	GCxGC	0.00116202
1-Nonene	C9H18	126.141	GCxGC	0.00643973
4-Phenylbut-3-ene-1-yne	C10H8	128.063	GCxGC	0.00125043
Naphthalene	C10H8	128.063	GCxGC	0.0262196
Nonane	C9H20	128.156	GCxGC	0.00149614
C10H10 isomer	C10H10	130.078	GCxGC	0.00062539
C10H10 isomer	C10H10	130.078	GCxGC	0.000499665
C10H10 isomer	C10H10	130.078	GCxGC	0.00593168
C10H10 isomer	C10H10	130.078	GCxGC	0.00485945
C10H10 isomer	C10H10	130.078	GCxGC	0.00123503
Methyl benzofuran isomer	C9H8O	132.058	GCxGC	0.00295779
Methyl benzofuran isomer	C9H8O	132.058	GCxGC	0.00616261
Methyl benzofuran isomer	C9H8O	132.058	GCxGC	0.00529135
C10H12 isomer	C10H12	132.094	GCxGC	0.000891054
C10H12 isomer	C10H12	132.094	GCxGC	0.000645183
C10H12 isomer	C10H12	132.094	GCxGC	0.000645755
C10H12 isomer	C10H12	132.094	GCxGC	0.00118959
C10H12 isomer	C10H12	132.094	GCxGC	0.00165197
C10H12 isomer	C10H12	132.094	GCxGC	0.0015243
C10H12 isomer	C10H12	132.094	GCxGC	0.000730517
C10H12 isomer	C10H12	132.094	GCxGC	0.000739835
C10H12 isomer	C10H12	132.094	GCxGC	0.000647558
C10H12 isomer	C10H12	132.094	GCxGC	0.00135332
C10H12 isomer	C10H12	132.094	GCxGC	0.000868727
C10H12 isomer	C10H12	132.094	GCxGC	0.000875961
Unknown	C8H6O2	134	PTR	0.0017881
Unknown	C9H10O	134	PTR	0.00475215
Benzene, 1-ethenyl-4-methoxy-	C9H10O	134.073	GCxGC	0.000553256
Acetophenone, 3'-methyl-	C9H10O	134.073	GCxGC	0.00174117
m-Cymene	C10H14	134.11	GCxGC	0.000606259
p-Cymene	C10H14	134.11	GCxGC	0.000840376
Benzene, 1,4-diethyl-	C10H14	134.11	GCxGC	0.000577329
Benzene, 1-methyl-3-propyl-	C10H14	134.11	GCxGC	0.00104218
Benzene, 1-methyl-4-propyl-	C10H14	134.11	GCxGC	0.000672593
Benzene, butyl-	C10H14	134.11	GCxGC	0.00118902
Benzene, 1-ethyl-3,5-dimethyl-	C10H14	134.11	GCxGC	0.00113266
Benzene, 1-methyl-2-propyl-	C10H14	134.11	GCxGC	0.000686049
Benzene, 2-ethyl-1,4-dimethyl-	C10H14	134.11	GCxGC	0.000792638
1,3-Dimethyl-4-ethylbenzene	C10H14	134.11	GCxGC	0.00127353
Benzene, 4-ethyl-1,2-dimethyl-	C10H14	134.11	GCxGC	0.0010561
1,2-Dimethyl-3-ethylbenzene	C10H14	134.11	GCxGC	0.000649976
Benzene, 1,2,3,5-tetramethyl-	C10H14	134.11	GCxGC	0.00171125
Unknown	C8H8O2	136	PTR	0.00580507
Acetic acid, phenyl ester	C8H8O2	136.052	GCxGC	0.000786074
Unknown	C9H12O	136	PTR	0.00774946
4-Ethyl Anisole	C9H12O	136.089	GCxGC	0.000531325
Gamma-Pyronene	C10H16	136.125	GCxGC	0.000499135
Alpha-Pinene	C10H16	136.125	GCxGC	0.000857538
Cyclohexene, 4-ethenyl-1,4-dimethyl-	C10H16	136.125	GCxGC	0.00208889
Limonene	C10H16	136.125	GCxGC	0.0175466
Beta-Phellandrene	C10H16	136.125	GCxGC	0.000884576
Unknown	C8H10O2	138	PTR	0.00672572
Unknown	C9H14O	138	PTR	0.00549836
1,9-Decadiene	C10H18	138.141	GCxGC	0.00075072
C10H18 isomer	C10H18	138.141	GCxGC	0.000266518
C10H18 isomer	C10H18	138.141	GCxGC	0.000251077
C10H18 isomer	C10H18	138.141	GCxGC	0.000735321
Unknown	C7H8O3	140	PTR	0.00187846
Unknown	C8H12O2	140	PTR	0.00301138
C10H20 isomer	C10H20	140.156	GCxGC	0.000309693
1-Decene	C10H20	140.156	GCxGC	0.00717376
C10H20 isomer	C10H20	140.156	GCxGC	0.000157588
CH3I	CH3I	141.939	WAS	5.44182e-05
Naphthalene, 2-methyl-	C11H10	142.078	GCxGC	0.00692334
Naphthalene, 1-methyl-	C11H10	142.078	GCxGC	0.00545526
C10H22 isomer	C10H22	142.172	GCxGC	0.000346916
C10H22 isomer	C10H22	142.172	GCxGC	0.000348206
Decane	C10H22	142.172	GCxGC	0.00134211
C10H22 isomer	C10H22	142.172	GCxGC	0.000348556
Unknown	C10H8O	144	PTR	0.00297273
Benzofuran, 2-ethenyl-	C10H8O	144.058	GCxGC	0.00099692
1-Undecene	C11H22	144.094	GCxGC	0.0043795
C11H12 isomer	C11H12	144.094	GCxGC	0.000449819
C11H12 isomer	C11H12	144.094	GCxGC	0.000580723
C11H12 isomer	C11H12	144.094	GCxGC	0.000915602
C11H12 isomer	C11H12	144.094	GCxGC	0.00164447
C11H12 isomer	C11H12	144.094	GCxGC	0.00170789
Ethyl-benzofuran isomer	C10H10O	146.073	GCxGC	0.00143931
Ethyl-benzofuran isomer	C10H10O	146.073	GCxGC	0.000832204
Benzofuran, -dimethyl- (isomer)	C10H10O	146.073	GCxGC	0.00172595
Benzofuran, -dimethyl- (isomer)	C10H10O	146.073	GCxGC	0.0030318
Ethyl-benzofuran isomer	C10H10O	146.073	GCxGC	0.0010284
Unknown	C9H8O2	148	PTR	0.00283721
Unknown	C10H12O	148	PTR	0.00320846
Benzene, pentyl-	C11H16	148.125	GCxGC	0.00121065
Benzene, 1-methyl-4-(2-methylpropyl)-	C11H16	148.125	GCxGC	0.000374762
Unknown	C9H10O2	150	PTR	0.00728913
Unknown	C11H18	150	PTR	0.00988451
Unknown	C12H8	152	PTR	0.0236093
Acenaphthylene	C12H8	152.063	GCxGC	0.00359401
1,10-Undecadiene	C11H20	152.156	GCxGC	0.000353814
Unknown	C8H10O3	154	PTR	0.0042542
Biphenyl	C12H10	154.078	GCxGC	0.00225158
C11H22 isomer	C11H22	154.172	GCxGC	0.00160559
Naphthalene, 1-ethyl-	C12H12	156.094	GCxGC	0.00147622
Naphthalene, 1,6-dimethyl-	C12H12	156.094	GCxGC	0.00145386
Naphthalene, 1,7-dimethyl-	C12H12	156.094	GCxGC	0.00201256
Undecane	C11H24	156.188	GCxGC	0.00104173
Unknown	C11H10O	158	PTR	0.00433878
Unknown	C10H8O2	160	PTR	0.00205273
1H-Inden-1-one, 2,3-dihydro-3,3-dimethyl-	C11H12O	160.089	GCxGC	0.001652
Unknown	C10H10O2	162	PTR	0.0043713
Benzene, hexyl-	C12H18	162.141	GCxGC	0.000596367
Unknown	C10H12O2	164	PTR	0.00405134
Unknown	C10H14O2	166	PTR	0.00305991
1-Dodecene	C12H24	168.188	GCxGC	0.00429685
Unknown	C13H14	170	PTR	0.00411054
Unknown	C8H12O4	172	PTR	0.00255901
Unknown	C11H10O2	174	PTR	0.00139945
Unknown	C12H14O	174	PTR	0.00169018
Unknown	C11H12O2	176	PTR	0.00269735
Unknown	C7H14O5	178	PTR	0.00208341
Unknown	C10H12O3	180	PTR	0.00227169
1-Tridecene	C13H26	182.203	GCxGC	0.00278495
C13H26 isomer	C13H26	182.203	GCxGC	0.00162665
C13H28 isomer	C13H28	184.219	GCxGC	0.000379046
Tridecane	C13H28	184.219	GCxGC	0.000837507
Unknown	C12H12O2	188	PTR	0.00164207
1-Tetradecene	C14H28	196.219	GCxGC	0.00242005
Tetradecane	C14H30	198.235	GCxGC	0.000452828
Total EF				1497.59
Total NMOG EF				9.53246
Sum of Positively or Tentatively Identified Compounds				8.75525
Percent of Positively or Tentatively Identified Compounds				0.918467

## Sheet: Indonesian Peat
Compound Name	Formula	Mass (g/mol)	Instrument	EF (g/kg)
Methane	CH4	16	FTIR	13.655
Carbon monoxide	CO	28	FTIR	223.625
Carbon dioxide	CO2	44	FTIR	1736.12
Acetylene	C2H2	26	FTIR	0.187092
Hydrogen Cyanide	HCN	27	FTIR	2.41619
Ethene	C2H4	28	FTIR	1.83431
Formaldehyde	HCHO	30	FTIR	0.541189
Ethane	C2H6	30.069	WAS	3.86695
Methanol	CH3OH	32	FTIR	1.81177
Propyne	C3H4	40	PTR	1.16059
Acetonitirile	C2H3N	41	PTR	0.260287
Ketene Fragments	C2H2O	42	PTR	0.633772
Propene	C3H6	42	FTIR	1.65309
Acetaldehyde	C2H4O	44	PTR	0.761929
Propane	C3H8	44.096	WAS	7.14022
Formic acid	HCOOH	46	FTIR	0.0675036
Methyl chloride	CH3Cl	50.488	WAS	0.393623
Butenyne	C4H4	52	PTR	0.0317025
Unknown	C3H3N	53	PTR	0.0400851
Acrylonitrile	C3H3N	53.0265	GCxGC	0.0183711
2-Propynal	C3H2O	54	PTR	0.0288907
1,3-Butadiene	C4H6	54	PTR	0.43875
Propanenitrile	C3H5N	55.0422	GCxGC	0.023893
Acrolein	C3H4O	56	PTR	0.134356
1-Butene	C4H8	56.107	WAS	0.622497
i-Butene	C4H8	56.107	WAS	1.00945
trans-2-Butene	C4H8	56.107	WAS	0.254467
cis-2-Butene	C4H8	56.107	WAS	0.201891
Acetone	C3H6O	58	PTR	0.823333
Propanal	C3H6O	58.0419	GCxGC	0.0387452
i-Butane	C4H10	58.123	WAS	0.834402
n-Butane	C4H10	58.123	WAS	1.77991
Acetic Acid	CH3COOH	60	FTIR	2.0252
Carbonyl sulfide	OCS	60.07	WAS	0.416541
Dimethyl Sulfide	C2H6S	62	PTR	0.0342004
Dimethyl Sulfide	C2H6S	62.129	WAS	0.0046575
Ethyl chloride	C2H5Cl	64.514	WAS	0.00137826
1,3-Cyclopentadiene	C5H6	66.047	GCxGC	0.0634692
Methacrylonitrile	C4H5N	67.0422	GCxGC	0.0129611
Pyrrole	C4H5N	67.0422	GCxGC	0.0551003
Carbon suboxide	C3O2	68	PTR	0.00556909
Furan	C4H4O	68	FTIR	0.572526
1,4-Pentadiene	C5H8	68.0626	GCxGC	0.0124495
Isoprene	C5H8	68.0626	GCxGC	0.313879
1,3-Pentadiene (E)	C5H8	68.0626	GCxGC	0.0902723
1,3-Pentadiene, (Z)-	C5H8	68.0626	GCxGC	0.0493296
Cyclopentene	C5H8	68.0626	GCxGC	0.0770641
Isobutyronitrile	C4H7N	69.0578	GCxGC	0.0182324
Butanenitrile	C4H7N	69.0578	GCxGC	0.0129778
Methacrolein	C4H6O	70.0419	GCxGC	0.0610864
2,3-Dihydrofuran	C4H6O	70.0419	GCxGC	0.00610075
Methyl vinyl ketone	C4H6O	70.0419	GCxGC	0.0934224
2-Butenal	C4H6O	70.0419	GCxGC	0.0167963
1-Pentene	C5H10	70.0783	WAS	0.354606
t-2-Pentene	C5H10	70.0783	WAS	0.194376
c-2-Pentene	C5H10	70.0783	WAS	0.0919348
3-Methyl-1-Butene	C5H10	70.0783	WAS	0.186496
2-Methyl-1-Butene	C5H10	70.0783	WAS	0.173363
2-Methyl-2-Butene	C5H10	70.0783	WAS	0.286311
Cyclopentane	C5H10	70.0783	WAS	0.120829
Methylglyoxal	C3H4O2	72	PTR	0.065627
Propanal, 2-methyl-	C4H8O	72.0575	GCxGC	0.147547
Butanal	C4H8O	72.0575	GCxGC	0.00672545
2-Butanone	C4H8O	72.0575	GCxGC	0.100144
n-pentane	C5H12	72.15	WAS	0.914074
Hydroxyacetone	C3H6O2	74	PTR	0.168281
Acetic acid, methyl ester	C3H6O2	74.0368	GCxGC	0.0802147
1,5-Hexadiene-3-yne	C6H6	78.047	GCxGC	0.00316863
Benzene	C6H6	78.047	GCxGC	0.877459
Pyridine	C5H5N	79.0422	GCxGC	0.118128
2,4-Cyclopentadiene-1-one	C5H4O	80	PTR	0.0481724
1,3-Cyclopentadiene, 1-methyl-	C6H8	80.0626	GCxGC	0.0466902
1,3-Cyclopentadiene, 5-methyl-	C6H8	80.0626	GCxGC	0.039447
1,3-Cyclohexadiene	C6H8	80.0626	GCxGC	0.0224125
1H-Pyrrole, 1-methyl-	C5H7N	81.0578	GCxGC	0.0312572
1H-Pyrrole, 2-methyl-	C5H7N	81.0578	GCxGC	0.0180363
Furan, 2-methyl-	C5H6O	82.0419	GCxGC	0.234522
Furan, 3-methyl-	C5H6O	82.0419	GCxGC	0.0249438
2-Cyclopenten-1-one	C5H6O	82.0419	GCxGC	0.0290905
1,4-Pentadiene, 2-methyl-	C6H10	82.0783	GCxGC	0.0065688
1,5-Hexadiene	C6H10	82.0783	GCxGC	0.014504
trans-1,4-Hexadiene	C6H10	82.0783	GCxGC	0.00715497
Cyclopentene, 3-methyl-	C6H10	82.0783	GCxGC	0.0311233
3-Hexyne	C6H10	82.0783	GCxGC	0.00830647
1,3-Butadiene, 2,3-dimethyl-	C6H10	82.0783	GCxGC	0.00523975
1,3-Hexadiene,c&t	C6H10	82.0783	GCxGC	0.0304457
1,3-Pentadiene, 2-methyl-, (E)-	C6H10	82.0783	GCxGC	0.0345548
4-Methyl-1,3-pentadiene	C6H10	82.0783	GCxGC	0.038773
Cyclopentene, 1-methyl-	C6H10	82.0783	GCxGC	0.0756678
1,3-Pentadiene, 3-methyl-, (Z)-	C6H10	82.0783	GCxGC	0.0142653
2,4-Hexadiene, (E,E)-	C6H10	82.0783	GCxGC	0.0146627
2,4-Hexadiene, (E,Z)-	C6H10	82.0783	GCxGC	0.0207036
Cyclohexene	C6H10	82.0783	GCxGC	0.0632932
Butanenitrile, 2-methyl-	C5H9N	83.0735	GCxGC	0.0157803
Butanenitrile, 3-methyl-	C5H9N	83.0735	GCxGC	0.0188193
2-Furanone	C4H4O2	84	PTR	0.114775
Thiophene	C4H4S	84.0034	GCxGC	0.0101308
3-Buten-2-one, 3-methyl-	C5H8O	84.0575	GCxGC	0.0349141
4-Penten-2-one	C5H8O	84.0575	GCxGC	0.00211589
1-Penten-3-one	C5H8O	84.0575	GCxGC	0.00266404
2-Butenal, 2-methyl-	C5H8O	84.0575	GCxGC	0.00632319
3-Penten-2-one, (E)-	C5H8O	84.0575	GCxGC	0.00498549
Cyclopentanone	C5H8O	84.0575	GCxGC	0.0296194
1-Pentene, 4-methyl-	C6H12	84.0939	GCxGC	0.0316417
1-Butene, 2,3-dimethyl-	C6H12	84.0939	GCxGC	0.0526978
1-Hexene	C6H12	84.0939	GCxGC	0.362562
2-Hexene, (E)-	C6H12	84.0939	GCxGC	0.0587471
2-Pentene, 2-methyl-	C6H12	84.0939	GCxGC	0.0492347
2-Hexene, (Z)-	C6H12	84.0939	GCxGC	0.0264449
2-Pentene, 3-methyl-, (E)-	C6H12	84.0939	GCxGC	0.0165419
Cyclopentane, methyl-	C6H12	84.0939	GCxGC	0.023999
2-pentene, 4-methyl	C6H12	84.0939	GCxGC	0.00712189
Cyclohexane	C6H12	84.0939	GCxGC	0.00632432
2,3-Butanedione	C4H6O2	86	PTR	0.122694
2,3-Butanedione	C4H6O2	86.0368	GCxGC	0.0433935
2-Propenoic acid, methyl ester	C4H6O2	86.0368	GCxGC	0.00720838
Butanal, 3-methyl-	C5H10O	86.0732	GCxGC	0.112723
2-Butanone, 3-methyl-	C5H10O	86.0732	GCxGC	0.0498073
Butanal, 2-methyl-	C5H10O	86.0732	GCxGC	0.0707528
2-Pentanone	C5H10O	86.0732	GCxGC	0.016447
Pentanal	C5H10O	86.0732	GCxGC	0.0137268
Hexane	C6H14	86.177	WAS	0.313322
2,3-Dimethyl butane	C6H14	86.177	WAS	0.135571
2-Methyl pentane	C6H14	86.177	WAS	0.142027
Unknown	C3H4O3	88	PTR	0.00713149
Ethyl acetate	C4H8O2	88	PTR	0.0580216
Methyl propionate	C4H8O2	88.0524	GCxGC	0.00923254
Unknown	C7H6	90	PTR	0.0765027
C7H8 isomer	C7H8	92.0626	GCxGC	0.00213361
Toluene	C7H8	92.0626	GCxGC	0.902146
Pyridine, 2-methyl-	C6H7N	93.0578	GCxGC	0.0202171
Phenol	C6H6O	94.0419	GCxGC	0.468999
Unknown	C7H10	94	PTR	0.217528
C7H10 isomer	C7H10	94.0783	GCxGC	0.00439869
C7H10 isomer	C7H10	94.0783	GCxGC	0.0200835
C7H10 isomer	C7H10	94.0783	GCxGC	0.00511907
C7H10 isomer	C7H10	94.0783	GCxGC	0.0133394
C7H10 isomer	C7H10	94.0783	GCxGC	0.0149243
C7H10 isomer	C7H10	94.0783	GCxGC	0.00742068
C7H10 isomer	C7H10	94.0783	GCxGC	0.0078447
C7H10 isomer	C7H10	94.0783	GCxGC	0.00435713
Methyl Bromide	CH3Br	94.939	WAS	0.0219918
1H-Pyrrole, 2,5-dimethyl-	C6H9N	95.0735	GCxGC	0.0137833
Furfural	C5H4O2	96.0211	GCxGC	0.347181
Furan, 2-ethyl-	C6H8O	96.0575	GCxGC	0.0119488
Furan, 2,5-dimethyl-	C6H8O	96.0575	GCxGC	0.0663914
Furan, 2,4-dimethyl-	C6H8O	96.0575	GCxGC	0.0342166
2-Cyclopenten-1-one, 2-methyl-	C6H8O	96.0575	GCxGC	0.021759
C7H12 isomer	C7H12	96.0939	GCxGC	0.00668341
1,6-Heptadiene	C7H12	96.0939	GCxGC	0.00806674
C7H12 isomer	C7H12	96.0939	GCxGC	0.00810591
3,5-Dimethylcyclopentene	C7H12	96.0939	GCxGC	0.0164873
C7H12 isomer	C7H12	96.0939	GCxGC	0.0179699
C7H12 isomer	C7H12	96.0939	GCxGC	0.00835066
Cyclopentene, 3-ethyl-	C7H12	96.0939	GCxGC	0.00972162
Vinylcyclopentane	C7H12	96.0939	GCxGC	0.00692355
1-Ethylcyclopentene	C7H12	96.0939	GCxGC	0.0100504
Cyclohexene, 3-methyl-	C7H12	96.0939	GCxGC	0.0165647
Cyclohexene, 4-methyl-	C7H12	96.0939	GCxGC	0.00799999
Cyclopentene, 4,4-dimethyl-	C7H12	96.0939	GCxGC	0.0371913
C7H12 isomer	C7H12	96.0939	GCxGC	0.0183086
C7H12 isomer	C7H12	96.0939	GCxGC	0.0121116
Cyclohexene, 1-methyl-	C7H12	96.0939	GCxGC	0.0302006
C7H12 isomer	C7H12	96.0939	GCxGC	0.00689506
Cyclopentane, ethylidene-	C7H12	96.0939	GCxGC	0.00598313
C7H12 isomer	C7H12	96.0939	GCxGC	0.00686371
2-Furan Methanol (furfuryl alcohol)	C5H6O2	98	PTR	0.107377
Thiophene, 2-methyl-	C5H6S	98.019	GCxGC	0.00667983
Unknown	C6H10O	98	PTR	0.050461
3-Pentanone, 2,4-dimethyl	C6H10O	98.0732	GCxGC	0.00795654
Cyclohexanone	C6H10O	98.0732	GCxGC	0.0149389
1-Hexene, 3-methyl-	C7H14	98.1096	GCxGC	0.00713385
1-Hexene, 5-methyl-	C7H14	98.1096	GCxGC	0.00647323
2-Hexene, 3-methyl-	C7H14	98.1096	GCxGC	0.0164526
1-Butene, 2-ethyl-3-methyl-	C7H14	98.1096	GCxGC	0.00352013
2-Hexene, 5-methyl-, (E)-	C7H14	98.1096	GCxGC	0.00453547
1-Heptene	C7H14	98.1096	GCxGC	0.224412
3-Heptene, (E)-	C7H14	98.1096	GCxGC	0.016197
2-Heptene, (E)-	C7H14	98.1096	GCxGC	0.0540357
2-Hexene, 3-methyl-, (E)-	C7H14	98.1096	GCxGC	0.0045435
2-Heptene (Z)	C7H14	98.1096	GCxGC	0.0281555
Cyclohexane, methyl-	C7H14	98.1096	GCxGC	0.01702
Cyclopentane, ethyl-	C7H14	98.1096	GCxGC	0.0213787
Unknown	C4H4O3	100	PTR	0.0354793
Unknown	C5H8O2	100	PTR	0.154701
2,3-Pentanedione	C5H8O2	100.052	GCxGC	0.00406034
Methyl Isobutyl Ketone	C6H12O	100.089	GCxGC	0.0109924
3-Pentanone, 2-methyl-	C6H12O	100.089	GCxGC	0.00639994
2-Pentanone, 3-methyl-	C6H12O	100.089	GCxGC	0.0202345
2-Hexanone	C6H12O	100.089	GCxGC	0.0106859
Hexanal	C6H12O	100.089	GCxGC	0.0106107
2-Methyl Hexane	C7H16	100.2	WAS	0.210322
3-Methyl Hexane	C7H16	100.2	WAS	0.360552
Heptane	C7H16	100.203	WAS	0.390609
Unknown	C5H10O2	102	PTR	0.108603
Ethynyl Benzene (phenylacetylene)	C8H6	102	PTR	0.0138748
Benzonitrile	C7H5N	103.042	GCxGC	0.0636424
Styrene	C8H8	104.063	GCxGC	0.0843005
Benzaldehyde	C7H6O	106	PTR	0.088102
Benzaldehyde	C7H6O	106.042	GCxGC	0.0301947
Ethyl Benzene	C8H10	106.167	WAS	0.20295
m&p xylene	C8H10	106.167	WAS	0.413858
o-Xylene	C8H10	106.167	WAS	0.294476
Unknown	C6H4O2	108	PTR	0.0356054
Phenol, 2-methyl	C7H8O	108.058	GCxGC	0.0949618
Unknown	C8H12	108	PTR	0.170313
C8H12 isomer	C8H12	108.094	GCxGC	0.00373984
C8H12 isomer	C8H12	108.094	GCxGC	0.00299357
C8H12 isomer	C8H12	108.094	GCxGC	0.00808692
C8H12 isomer	C8H12	108.094	GCxGC	0.00433809
C8H12 isomer	C8H12	108.094	GCxGC	0.00425229
C8H12 isomer	C8H12	108.094	GCxGC	0.00392662
C8H12 isomer	C8H12	108.094	GCxGC	0.00387136
Catechol (Benzenediols); Methylfurfural	C6H6O2	110	PTR	0.209437
5-methyl-furfural	C6H6O2	110.037	GCxGC	0.0511627
Unknown	C7H10O	110	PTR	0.113618
Furan, 2-ethyl-5-methyl-	C7H10O	110.073	GCxGC	0.0143923
Furan, 2,3,5-trimethyl-	C7H10O	110.073	GCxGC	0.00739297
C8H14 isomer	C8H14	110.11	GCxGC	0.003944
C8H14 isomer	C8H14	110.11	GCxGC	0.00427685
1,7-Octadiene	C8H14	110.11	GCxGC	0.00947854
C8H14 isomer	C8H14	110.11	GCxGC	0.0034448
C8H14 isomer	C8H14	110.11	GCxGC	0.00351996
C8H14 isomer	C8H14	110.11	GCxGC	0.00580221
Cyclopentene, 3-propyl-	C8H14	110.11	GCxGC	0.00842724
C8H14 isomer	C8H14	110.11	GCxGC	0.0110823
C8H14 isomer	C8H14	110.11	GCxGC	0.0136774
C8H14 isomer	C8H14	110.11	GCxGC	0.00341442
C8H14 isomer	C8H14	110.11	GCxGC	0.00522733
C8H14 isomer	C8H14	110.11	GCxGC	0.00693064
C8H14 isomer	C8H14	110.11	GCxGC	0.00544112
C8H14 isomer	C8H14	110.11	GCxGC	0.00850923
C8H14 isomer	C8H14	110.11	GCxGC	0.0047428
Cyclohexane, ethylidene-	C8H14	110.11	GCxGC	0.00762971
C8H14 isomer	C8H14	110.11	GCxGC	0.00377263
Unknown	C5H4O3	112	PTR	0.0519114
2-Hydroxy-3-Methyl-2-Cyclopentenone	C6H8O2	112	PTR	0.0748566
C8H16 isomer	C8H16	112.125	GCxGC	0.0055598
3-heptene, 2-methyl-(Z)	C8H16	112.125	GCxGC	0.0051005
1-hexene, 2,5-dimethyl	C8H16	112.125	GCxGC	0.0138057
3-Heptene, 2-methyl-, (E)-	C8H16	112.125	GCxGC	0.00391767
2-Heptene, 6-methyl- (E)	C8H16	112.125	GCxGC	0.00810288
2-Heptene, 6-methyl- (Z)	C8H16	112.125	GCxGC	0.00983603
1-Heptene, 2-methyl-	C8H16	112.125	GCxGC	0.0079243
1-Octene	C8H16	112.125	GCxGC	0.187627
3-Octene, (E)-	C8H16	112.125	GCxGC	0.0102123
2-Methyl-2-heptene	C8H16	112.125	GCxGC	0.0122265
2-Octene (E)	C8H16	112.125	GCxGC	0.0248827
Cyclohexane, 1,3-dimethyl-, trans-	C8H16	112.125	GCxGC	0.0029948
2-Octene, (Z)-	C8H16	112.125	GCxGC	0.015852
Cyclopentane, 1-ethyl-2-methyl-, cis-	C8H16	112.125	GCxGC	0.00250375
1-Pentene, 3-ethyl-3-methyl-	C8H16	112.125	GCxGC	0.00355846
Cyclopentane, propyl-	C8H16	112.125	GCxGC	0.00902076
Cyclohexane, ethyl-	C8H16	112.125	GCxGC	0.0101116
1-Hexene, 4,5-dimethyl-	C8H16	112.125	GCxGC	0.00456725
Unknown	C5H6O3	114	PTR	0.0398064
Unknown	C6H10O2	114	PTR	0.0360001
2,3-Hexanedione	C6H10O2	114.068	GCxGC	0.00814431
2,3-Pentanedione, 4-methyl-	C6H10O2	114.068	GCxGC	0.00413742
2-Heptanone	C7H14O	114.105	GCxGC	0.00862173
Heptanal	C7H14O	114.105	GCxGC	0.0174088
Pentane,2,3,3-trimethyl	C8H18	114.141	GCxGC	0.00520123
Heptane, 2-methyl-	C8H18	114.141	GCxGC	0.0341503
Heptane, 3-methyl-	C8H18	114.141	GCxGC	0.00170336
Octane	C8H18	114.141	GCxGC	0.183484
Unknown	C5H8O3	116	PTR	0.0298855
Indene	C9H8	116.063	GCxGC	0.0275702
Benzofuran	C8H6O	118.042	GCxGC	0.047586
2-propenyl benzene	C9H10	118.078	GCxGC	0.0115847
à-Methylstyrene	C9H10	118.078	GCxGC	0.00654995
Benzene, 1-propenyl-cis	C9H10	118.078	GCxGC	0.00819646
Benzene, 1-ethenyl-3-methyl-	C9H10	118.078	GCxGC	0.0437214
Benzene, 1-propenyl-trans	C9H10	118.078	GCxGC	0.0197574
Indane	C9H10	118.078	GCxGC	0.0257304
2-Butyl nitrate	C4H9NO3	119.12	WAS	0.011966
Vinylphenol	C8H8O	120	PTR	0.0505789
Acetophenone	C8H8O	120.058	GCxGC	0.0113853
Benzene, isopropyl-	C9H12	120.094	GCxGC	0.00494423
Benzene, propyl-	C9H12	120.094	GCxGC	0.0441701
Benzene, 1-ethyl-3-methyl-	C9H12	120.094	GCxGC	0.0426632
Benzene, 1-ethyl-4-methyl-	C9H12	120.094	GCxGC	0.0206957
Benzene, 1,3,5-trimethyl-	C9H12	120.094	GCxGC	0.0172502
Benzene, 1-ethyl-2-methyl-	C9H12	120.094	GCxGC	0.0482309
Benzene, 1,2,4-trimethyl-	C9H12	120.094	GCxGC	0.0758817
Benzene, 1,2,3-trimethyl-	C9H12	120.094	GCxGC	0.0600614
Salicylaldehyde	C7H6O2	122	PTR	0.0561273
Xylenol (2,5-Dimethyl phenol)	C8H10O	122	PTR	0.0875341
4-methyl-Anisole	C8H10O	122.073	GCxGC	0.0100193
Unknown	C9H14	122	PTR	0.0609939
C9H14 isomer	C9H14	122.11	GCxGC	0.00972142
C9H14 isomer	C9H14	122.11	GCxGC	0.00662199
C9H14 isomer	C9H14	122.11	GCxGC	0.00318275
C9H14 isomer	C9H14	122.11	GCxGC	0.0096261
Unknown	C6H4O3	124	PTR	0.0266617
Guaiacol (2-Methoxyphenol)	C7H8O2	124	PTR	0.238507
o-Guaiacol	C7H8O2	124.052	GCxGC	0.0786168
C9H16 isomer	C9H16	124.125	GCxGC	0.0211935
C9H16 isomer	C9H16	124.125	GCxGC	0.0144784
C9H16 isomer	C9H16	124.125	GCxGC	0.00951857
1,8-Nonadiene	C9H16	124.125	GCxGC	0.00807173
C9H16 isomer	C9H16	124.125	GCxGC	0.00469637
C9H16 isomer	C9H16	124.125	GCxGC	0.00480062
C9H16 isomer	C9H16	124.125	GCxGC	0.00642617
C9H16 isomer	C9H16	124.125	GCxGC	0.0142852
C9H16 isomer	C9H16	124.125	GCxGC	0.00848335
C9H16 isomer	C9H16	124.125	GCxGC	0.00801908
C9H16 isomer	C9H16	124.125	GCxGC	0.00880184
C9H16 isomer	C9H16	124.125	GCxGC	0.00599581
C9H16 isomer	C9H16	124.125	GCxGC	0.00653318
Hydroxymethylfurfural	C6H6O3	126	PTR	0.0654941
Unknown	C7H10O2	126	PTR	0.0853227
Cyclohexane, 1,1,3-trimethyl-	C9H18	126.141	GCxGC	0.0129
1-Heptene, 2,6-dimethyl-	C9H18	126.141	GCxGC	0.0228509
2-Heptene, 2,6-dimethyl-	C9H18	126.141	GCxGC	0.0208092
4-Nonene, E	C9H18	126.141	GCxGC	0.00961781
1-Nonene	C9H18	126.141	GCxGC	0.143163
4-Nonene, Z	C9H18	126.141	GCxGC	0.0146739
2-Nonene, (E)-	C9H18	126.141	GCxGC	0.0212729
cis-2-Nonene	C9H18	126.141	GCxGC	0.0114856
Cyclopentane, butyl-	C9H18	126.141	GCxGC	0.0148712
1-Octene, 4-methyl-	C9H18	126.141	GCxGC	0.00866558
1-Octene, 4-methyl-	C9H18	126.141	GCxGC	0.00492081
Naphthalene	C10H8	128	PTR	0.143538
Naphthalene	C10H8	128.063	GCxGC	0.0460364
Heptane, 2,6-dimethyl-	C9H20	128.156	GCxGC	0.0134666
Heptane, 2,3-dimethyl-	C9H20	128.156	GCxGC	0.00627921
Octane, 2-methyl-	C9H20	128.156	GCxGC	0.00587658
Octane, 3-methyl-	C9H20	128.156	GCxGC	0.00566174
Nonane	C9H20	128.156	GCxGC	0.153788
Assorted HCs inc. Dihydronaphthalene	C10H10	130	PTR	0.0919763
C10H10 isomer	C10H10	130.078	GCxGC	0.0204577
C10H10 isomer	C10H10	130.078	GCxGC	0.0198383
Methyl benzofuran isomer	C9H8O	132.058	GCxGC	0.0110575
Methyl benzofuran isomer	C9H8O	132.058	GCxGC	0.0234612
Methyl benzofuran isomer	C9H8O	132.058	GCxGC	0.0271322
C10H12 isomer	C10H12	132.094	GCxGC	0.00772669
C10H12 isomer	C10H12	132.094	GCxGC	0.00734535
C10H12 isomer	C10H12	132.094	GCxGC	0.0107607
C10H12 isomer	C10H12	132.094	GCxGC	0.0193279
C10H12 isomer	C10H12	132.094	GCxGC	0.0078828
C10H12 isomer	C10H12	132.094	GCxGC	0.0106243
C10H12 isomer	C10H12	132.094	GCxGC	0.0139019
C10H12 isomer	C10H12	132.094	GCxGC	0.00852193
3-pentyl nitrate	C5H11NO3	133.147	WAS	0.00184655
3-Methyl-2-Butyl Nitrate	C5H11NO3	133.147	WAS	0.0227575
Unknown	C9H10O	134	PTR	0.0335173
Benzene, isobutyl-	C10H14	134.11	GCxGC	0.00648717
m-Cymene	C10H14	134.11	GCxGC	0.00614203
p-Cymene	C10H14	134.11	GCxGC	0.0232431
Benzene, 1-methyl-3-propyl-	C10H14	134.11	GCxGC	0.0154422
Benzene, 1-methyl-4-propyl-	C10H14	134.11	GCxGC	0.0105001
Benzene, butyl-	C10H14	134.11	GCxGC	0.02853
Benzene, 1-ethyl-3,5-dimethyl-	C10H14	134.11	GCxGC	0.00967142
Benzene, 1-methyl-2-propyl-	C10H14	134.11	GCxGC	0.0207242
Benzene, 2-ethyl-1,4-dimethyl-	C10H14	134.11	GCxGC	0.0102101
1,3-Dimethyl-4-ethylbenzene	C10H14	134.11	GCxGC	0.0156374
Benzene, 4-ethyl-1,2-dimethyl-	C10H14	134.11	GCxGC	0.0130559
Benzene, 2-ethyl, 1,3-dimethyl	C10H14	134.11	GCxGC	0.00652567
Benzene, 1,2,3,5-tetramethyl-	C10H14	134.11	GCxGC	0.022188
Benzene, 1,2,3,4-tetramethyl-	C10H14	134.11	GCxGC	0.0356414
Unknown	C8H8O2	136	PTR	0.0317154
Benzoic acid, methyl ester	C8H8O2	136.052	GCxGC	0.00506238
Unknown	C9H12O	136	PTR	0.0395695
2,3-Dimethylanisole	C9H12O	136.089	GCxGC	0.00602096
Alpha-Pinene	C10H16	136.236	WAS	0.153194
Beta-Pinene	C10H16	136.236	WAS	0.280856
Unknown	C8H10O2	138	PTR	0.11318
C10H18 isomer	C10H18	138.141	GCxGC	0.00814353
C10H18 isomer	C10H18	138.141	GCxGC	0.0119914
1,9-Decadiene	C10H18	138.141	GCxGC	0.0116433
C10H18 isomer	C10H18	138.141	GCxGC	0.00823468
C10H18 isomer	C10H18	138.141	GCxGC	0.00480689
C10H18 isomer	C10H18	138.141	GCxGC	0.0137983
C10H18 isomer	C10H18	138.141	GCxGC	0.0100988
C10H18 isomer	C10H18	138.141	GCxGC	0.00539807
C10H18 isomer	C10H18	138.141	GCxGC	0.00560469
Unknown	C7H8O3	140	PTR	0.100335
C10H20 isomer	C10H20	140.156	GCxGC	0.0190546
C10H20 isomer	C10H20	140.156	GCxGC	0.0131934
C10H20 isomer	C10H20	140.156	GCxGC	0.0119307
C10H20 isomer	C10H20	140.156	GCxGC	0.0126975
1-Decene	C10H20	140.156	GCxGC	0.128307
C10H20 isomer	C10H20	140.156	GCxGC	0.0231309
C10H20 isomer	C10H20	140.156	GCxGC	0.0197937
C10H20 isomer	C10H20	140.156	GCxGC	0.0100641
C10H20 isomer	C10H20	140.156	GCxGC	0.00691979
C10H20 isomer	C10H20	140.156	GCxGC	0.00641149
Methyl Iodide	CH3I	141.939	WAS	0.0159554
Naphthalene, 2-methyl-	C11H10	142.078	GCxGC	0.0351975
Naphthalene, 1-methyl-	C11H10	142.078	GCxGC	0.0336139
C10H22 isomer	C10H22	142.172	GCxGC	0.0209283
C10H22 isomer	C10H22	142.172	GCxGC	0.0167826
Nonane, 2-methyl-	C10H22	142.172	GCxGC	0.0120991
Decane	C10H22	142.172	GCxGC	0.135806
Unknown	C10H8O	144	PTR	0.145322
C11H12 Isomer	C11H12	144.094	GCxGC	0.00667182
C11H12 Isomer	C11H12	144.094	GCxGC	0.0101753
C11H12 Isomer	C11H12	144.094	GCxGC	0.0101269
Benzofuran, dimethyl- (isomer)	C10H10O	146.073	GCxGC	0.0132868
Benzofuran, dimethyl- (isomer)	C10H10O	146.073	GCxGC	0.0161283
Unknown	C11H14	146	PTR	0.0530325
C11H14 isomer	C11H14	146.11	GCxGC	0.0114911
Unknown	C10H12O	148	PTR	0.0209458
Unknown	C9H8O2	148	PTR	0.0249651
C11H16 isomer	C11H16	148.125	GCxGC	0.0158342
C11H16 isomer	C11H16	148.125	GCxGC	0.0116943
C11H16 isomer	C11H16	148.125	GCxGC	0.0145417
C11H16 isomer	C11H16	148.125	GCxGC	0.0116713
Benzene, pentyl-	C11H16	148.125	GCxGC	0.0264609
C11H16 isomer	C11H16	148.125	GCxGC	0.0197182
Unknown	C9H10O2	150	PTR	0.0739151
Unknown	C12H8	152	PTR	0.181918
1,10-Undecadiene	C11H20	152.156	GCxGC	0.014258
C11H20 isomer	C11H20	152.156	GCxGC	0.00585891
C11H20 isomer	C11H20	152.156	GCxGC	0.00710501
Unknown	C8H10O3	154	PTR	0.0582326
Biphenyl	C12H10	154.078	GCxGC	0.0210699
C11H22 Isomer	C11H22	154.172	GCxGC	0.00641453
C11H22 Isomer	C11H22	154.172	GCxGC	0.00787825
C11H22 Isomer	C11H22	154.172	GCxGC	0.00890138
1-Undecene	C11H22	154.172	GCxGC	0.094432
C11H22 Isomer	C11H22	154.172	GCxGC	0.00437773
C11H22 Isomer	C11H22	154.172	GCxGC	0.0159984
C11H22 Isomer	C11H22	154.172	GCxGC	0.00805304
Unknown	C12H12	156	PTR	0.107859
Naphthalene, 1,3-dimethyl-	C12H12	156.094	GCxGC	0.0468251
C11H24 isomer	C11H24	156.188	GCxGC	0.0312892
C11H24 isomer	C11H24	156.188	GCxGC	0.0137375
C11H24 isomer	C11H24	156.188	GCxGC	0.0165133
Undecane	C11H24	156.188	GCxGC	0.105472
Benzene, hexyl-	C12H18	162.141	GCxGC	0.0189243
Benzene, (1,3-dimethylbutyl)-	C12H18	162.141	GCxGC	0.0108771
Unknown	C10H12O2	164	PTR	0.0494972
1,11-Dodecadiene	C12H22	166.172	GCxGC	0.014124
C12H24 isomer	C12H24	168.188	GCxGC	0.0120338
1-Dodecene	C12H24	168.188	GCxGC	0.0980512
C12H24 isomer	C12H24	168.188	GCxGC	0.020502
C12H24 isomer	C12H24	168.188	GCxGC	0.0129853
C12H24 isomer	C12H24	168.188	GCxGC	0.0167694
C12H24 isomer	C12H24	168.188	GCxGC	0.0111244
C12H24 isomer	C12H24	168.188	GCxGC	0.0100364
C12H26 isomer	C12H26	170.203	GCxGC	0.0109839
Dodecane	C12H26	170.203	GCxGC	0.0878037
Benzene, heptyl-	C13H20	176.156	GCxGC	0.00934246
1,12-tridecadiene	C13H24	180.33	GCxGC	0.0129359
C13H26 isomer	C13H26	182.203	GCxGC	0.0145545
1-Tridecene	C13H26	182.203	GCxGC	0.053008
C13H26 isomer	C13H26	182.203	GCxGC	0.0114621
C13H26 isomer	C13H26	182.203	GCxGC	0.00959236
Dodecanal	C12H24O	184.183	GCxGC	0.00477705
C13H28 isomer	C13H28	184.219	GCxGC	0.0350441
Tridecane	C13H28	184.219	GCxGC	0.058077
C14H20 isomer	C14H20	188.156	GCxGC	0.0182636
C14H26 isomer	C14H26	194.356	GCxGC	0.0215126
C14H28 isomer	C14H28	196.219	GCxGC	0.0194464
1-Tetradecene	C14H28	196.219	GCxGC	0.0393195
Tetradecane	C14H30	198.235	GCxGC	0.0262871
à-Calacorene	C15H20	200.156	GCxGC	0.0129277
Calamenene	C15H22	202.172	GCxGC	0.0180386
Ledane	C15H26	206.203	GCxGC	0.0187049
1H-Cycloprop[e]azulene, decahydro-1,1,4,7-tetramethyl-, [1aR-(1aà,4á,4aá,7á,7aá,7bà)]-	C15H26	206.203	GCxGC	0.0173378
Patchulane	C15H26	206.203	GCxGC	0.0232646
1-Pentadecene	C15H30	210.4	GCxGC	0.0155169
C15H32	C15H32	212.25	GCxGC	0.0191322
C15H32	C15H32	212.25	GCxGC	0.0163058
Pentadecane	C15H32	212.25	GCxGC	0.00908389
Tribromomethane	CHBr3	252.73	WAS	0.00502066
Total EF				2026.47
Total NMOG EF				53.069
Sum of Positively or Tentatively Identified Compounds				48.6876
Percent of Positively or Tentatively Identified Compounds				0.91744
